# Supplementary material for: Peroxisomal biogenesis is genetically and biochemically linked to carbohydrate metabolism in Drosophila and mouse
Source: PLoS Genet. 2017 Jun 22;13(6):e1006825. doi: 10.1371/journal.pgen.1006825 (PMC5480855; doi:10.1371/journal.pgen.1006825)
Supplement: S1 Table — Source data from the GC MS analysis on fly and human samples for peroxisomal lipids as well as source data of LC-MSMS analysis (XLSX) [file pgen.1006825.s014.xlsx]

## Sheet: Sheet1
Figure 2A Source Data Gas Chromatograph Mass Spectrometry
Sample		Adult Flies	Adult Flies	Adult Flies	Adult Flies	Adult Flies	Adult Flies	Adult Flies	Adult Flies
Genotype		pex2ex2/Df	pex2ex1/Df	pex2ex2 rescue	pex2ex1 rescue	pex16-1/Df	pex16EY/Df	pex16-1 rescue	pex16EY rescue
C24:0 - Lignoceric		0.00269948	0.00268825	0.000822596	0.000837454	0.00226072	0.0017842	0.000917175	0.000909643
C26:0 - Hexacosanoic		0.00104298	0.000992529	0.000332909	0.000368227	0.000705678	0.000551041	0.000311102	0.000328603
C28:0 - Octacosanoic		0.000456304	0.000454146	8.70984e-05	8.83745e-05	0.000415105	0.000350419	0.000106005	0.000106633
C30:0		0.000237738	0.00023806	3.29038e-05	2.94582e-05	0.000226711	0.000168522	4.60892e-05	8.05186e-05
Sample		Larvae	Larvae	Larvae	Larvae	Larvae	Larvae	Larvae	Larvae
Genotype		pex2ex2/Df	pex2ex1/Df	pex2ex2 rescue	pex2ex1 rescue	pex16-1/Df	pex16EY/Df	pex16-1 rescue	pex16EY rescue
C24:0 - Lignoceric		0.000522976	0.000447796	0.000281254	0.000263504	0.000427959	0.000456044	0.000222745	0.000236626
C26:0 - Hexacosanoic		0.000174325	0.000160129	9.00505e-05	7.79379e-05	0.000176706	0.000203827	8.21778e-05	7.24157e-05
C28:0 - Octacosanoic		0.000175709	0.000148793	9.12841e-05	8.16492e-05	0.000176706	0.000162768	9.08281e-05	0.000107094
C30:0		8.57792e-05	7.79391e-05	6.16784e-05	5.6907e-05	7.45476e-05	7.91846e-05	4.97392e-05	7.03758e-05
Figure 2C+E Source Data by LC-MSMS
Genotype (Larvae)	FRT80B/Df	pex2ex2/Df	pex2ex1/Df	pex2ex2 rescue	pex2ex1 rescue	FRT80B/Df	pex16-1/Df	pex16EY/Df	pex16-1 rescue	pex16EY rescue
C16:0-Lyso-PAF	2750	2030	2470	3840	6370	9750	1830	5120	7270	13400
2H4-C16:0-Lyso-PAFISTD	363000	453000	383000	511000	615000	661000	363000	478000	450000	1400000
16:0LPC	2750000	4910000	5020000	5870000	5180000	5250000	5540000	6640000	5690000	5130000
1-C18:0-lyso-PAF	8230	7460	29200	422000	19800	23200	14900	33200	489000	26000
18:2LPC	849000	1450000	1720000	1470000	1820000	2030000	2270000	2220000	1600000	1980000
18:1LPC	1380000	2320000	2790000	3430000	3890000	3950000	3860000	3760000	3290000	3610000
18:0LPC	364000	833000	855000	1230000	1580000	1850000	1170000	1540000	1280000	1440000
20:0LPC	35300	86900	99400	63300	72000	112000	161000	179000	60600	83100
22:0LPC	1190	7690	8380	1480	1460	1810	8740	9060	2490	2080
24:0LPC	397	1100	909	45.2	64.4	212	1070	605	31.1	186
26:0LPC	6620	1630	1750	8750	6760	5790	1460	3340	3430	7780
2H4-26:0LPC ISTD	2820	4020	3420	2600	2650	3270	3330	3490	2940	6960
16:0p/20:4 PE plasm	48.7	0	32.2	49.6	33.1	0	16.1	215	66.1	16.4
16:0p/18:1 PE plasm	48.9	32.4	16.3	0	116	82.7	116	99.2	82.7	99.2
18:1p/20:4 PE plasm	5610	471	546	4780	10300	16800	397	331	7110	16900
18:0p/20:4 PE plasm	162	132	65.3	82.3	65.4	32.7	49.1	82.1	99.2	82.7
Total lysoPC cps	5397487	9619810	10527109	1.24994e+07	1.25765e+07	13232762	13029000	14390325	1.24228e+07	12292546
pmolesC26:0LPC/20 larvae	36.6213	6.32537	7.98246	52.5	39.7947	27.622	6.83964	14.9295	18.2	17.4379
Total nmoles LPCs/20larvae	29.8584	37.3306	48.0184	74.9965	74.035	63.1288	61.0368	64.3235	65.917	27.5523
ratio 24/22	0.333613	0.143043	0.108473	0.0305405	0.0441096	0.117127	0.122426	0.066777	0.01249	0.0894231
ratio 26/22	5.56303	0.211964	0.208831	5.91216	4.63014	3.1989	0.167048	0.368653	1.37751	3.74038
ratio 24/20	0.0112465	0.0126582	0.00914487	0.00071406	0.000894444	0.00189286	0.00664596	0.00337989	0.000513201	0.00223827
ratio 26/20	0.187535	0.0187572	0.0176056	0.138231	0.0938889	0.0516964	0.00906832	0.0186592	0.0566007	0.0936221
Figure 2B+D Source Data by LC-MSMS
Sample	Normal	Normal	PBD	PBD
C16:0-Lyso-PAF	23400	24600	4180	4270
2H4-C16:0-Lyso-PAFISTD	231000	223000	228000	250000
16:0LPC	1070000	831000	2140000	2050000
1-C18:0-lyso-PAF	11900	11500	3130	3370
18:2LPC	147000	127000	517000	512000
18:1LPC	154000	124000	740000	790000
18:0LPC	332000	283000	669000	657000
20:0LPC	2780	2360	7820	7640
22:0LPC	913	907	1890	1670
24:0LPC	2300	2230	10100	8760
26:0LPC	1180	1220	25100	22800
2H9-26:0LPC ISTD	75600	69600	92500	83600
16:0p/20:4 PE plasm	30400	23100	265	132
16:0p/18:1 PE plasm	19700	14200	281	99.2
18:1p/20:4 PE plasm	14000	12000	203	79
18:0p/20:4 PE plasm	62700	52200	704	190
Total lysoPC cps	1745473	1407817	4118220	4057510
pmolesC26:0LPC/1/8" DBS	0.243492	0.273448	4.23308	4.25455
Total nmoles LPCs/1/8" DBS	0.360177	0.315545	0.694532	0.757143
ratio 24/22	2.51917	2.45865	5.34392	5.24551
ratio 26/22	1.29244	1.34509	13.2804	13.6527
ratio 24/20	0.827338	0.944915	1.29156	1.1466
ratio 26/20	0.42446	0.516949	3.20972	2.98429
