# Supplementary material for: Peroxisomal biogenesis is genetically and biochemically linked to carbohydrate metabolism in Drosophila and mouse
Source: PLoS Genet. 2017 Jun 22;13(6):e1006825. doi: 10.1371/journal.pgen.1006825 (PMC5480855; doi:10.1371/journal.pgen.1006825)
Supplement: S6 Table — The gene clusters for Drosophila peroxisomal genes- the top 1000 co-regulated genes in the fly genome are shown for each of the clusters 5 clusters for Drosophila data (See Materials and Methods). (XLSX) [file pgen.1006825.s019.xlsx]

## Sheet: Sheet1
Cluster 1				Cluster 2				Cluster 3				Cluster 4				Cluster 5
Peroxisomal Genes	Top 1000 co-regulated genes	score		Peroxisomal Genes	Top 1000 co-regulated genes	score		Peroxisomal Genes	Top 1000 co-regulated genes	score		Peroxisomal Genes	Top 1000 co-regulated genes	score		Peroxisomal Genes	Top 1000 co-regulated genes	score
153136_at|CG14804	151898_at|Kap-alpha1	16.7		141646_at|CG17544	153946_at|CG2185	12.75		148138_at|CG1134	141671_s_at|CG17597	13.9		151807_at|CG5590	151983_at|CG16936	13.375		151877_at|CG5707	142390_at|CG3246	13.1
153904_at|CG5625	154527_at|alpha-Cat	16.2		146922_at|CCS	153842_at|ifc	12.5833		148168_at|CG32250	142510_at|EfTuM	12.9		146151_at|CG5362	141671_s_at|CG17597	13		152200_at|ry	152743_at|CG14629	12.7
153133_at|Drp1	143240_at|lt	15.6		152121_s_at|CG5009	145511_at|CG3164	12.1667		147946_at|CG13890	153596_at|Dip-C	11.3		152449_at|CG4389	152903_at|CG6028	12.5625		152569_at|CG11919	151932_at|Cyt-b5-r	12.6
154511_at|CG8378	144151_at|nes	15.4		141563_at|Acox57D-p	153713_at|ScpX	11.9091		149650_at|CG6567	152603_at|CG3415	10.8889		154907_at|CG11309	145030_at|CG11151	12.5333		152448_at|CG11236	153368_at|fat-spondin	12.2
151723_at|CG7737	154404_at|CG10417	15		154311_at|CG7461	144151_at|nes	11.6667		154892_at|CG11208	142709_s_at|CG6543	10.6		152367_at|CG9319	152970_at|Aldh-III	12.0625		144148_at|CG1315	146960_at|CG12338	12.1111
154488_at|CG2316	153799_at|MED26	14.9		141776_at|CG12428	152212_at|CG4287	11.5		152603_at|CG3415	142702_at|CG2263	10.4		141671_s_at|CG17597	146911_at|CG12140	11.875		146960_at|CG12338	145332_at|CG7322	12.1
154081_at|mod	154387_at|Aats-ile	14.8		153849_at|l(2)k09913	153128_at|CG4802	11.0833		145415_at|CG9577	152090_at|CG6746	10.2		151795_at|Idh	142709_s_at|CG6543	11.8125		154075_at|Acox57D-d	152448_at|CG11236	11.7778
151998_at|CG10194	153267_at|eIF-4G	14.6		154150_at|Got1	154488_at|CG2316	10.9167		152884_at|CG4663	143301_at|Pgk	10.2		141484_at|CG10672	152090_at|CG6746	11.6875		145821_at|CG12512	153364_at|CG9232	11.6
153407_at|Ide	151718_at|Stim	14.3		153962_at|CG3947	152121_s_at|CG5009	10.9091		143993_at|CG14815	151947_at|CG8818	10.2		145030_at|CG11151	142499_at|colt	11.6875		152178_at|SpdS	145636_at|CG3597	11.6
149942_at|tefu	152507_at|sax	14.3		144709_at|CG11284	153468_at|nrv1	10.6667		145395_at|CG12703	148244_at|CG33523	10.1		143093_at|Cat	146084_at|Aldh	11.625		153046_at|Spat	152211_at|CG6950	11.5
	153622_at|Crk	14		154952_at|CG6859	151983_at|CG16936	10.6667			143012_at|Rpt1	10.1		149399_at|CG1041	152276_at|wal	11.625			152078_at|CG9547	11.4
	154677_at|pelo	13.9		153713_at|ScpX	142165_at|CG3625	10.5833			154053_at|Trxr-1	9.9		153203_at|CG6178	142408_at|CG4729	11.375			150181_at|Cyp12a4	11.4
	142558_s_at|Eb1	13.9			144016_at|NPC1	10.5			143896_at|ND75	9.8		153945_at|CG7970	154176_at|Tal	11.3125			152482_at|CG11594	11.3
	153888_at|Ogt	13.8			154768_at|CG5482	10.4167			143000_at|CG5525	9.7		142194_at|CG9527	147472_at|Jheh2	11.25			151797_at|fbp	11.2
	153683_at|Rad23	13.8			141619_at|Fatp	10.4167			152837_at|CG4685	9.5		153422_at|Vha44	153945_at|CG7970	11.2			152648_at|CG2736	11.2
	151629_at|l(2)s5379	13.7			154907_at|CG11309	10.25			154303_at|Scsalpha	9.5		149633_at|CG14688	153713_at|ScpX	11.1875			152027_at|Ance-5	11.2
	154044_at|Ank	13.4			151718_at|Stim	10.1667			152884_at|CG4663	9.44444			144037_at|Irp-1B	11			142139_at|CG3699	10.9
	153829_at|auxillin	13.4			153622_at|Crk	10.1667			151795_at|Idh	9.4			151826_at|CG6783	11			152276_at|wal	10.8
	141577_at|CG1902	13.2			143735_at|MAPk-Ak2	10.1667			152334_at|Tpi	9.4			154477_at|ND42	11			154763_at|Pgm	10.8
	143716_at|Arf51F	13.2			154311_at|CG7461	10			145030_at|CG11151	9.3			154763_at|Pgm	11			154907_at|CG11309	10.8
	154189_at|Syx7	13.2			154527_at|alpha-Cat	9.91667			152903_at|CG6028	9.3			155150_at|---	10.9375			150404_at|CG17244	10.8
	152738_at|msps	12.9			141577_at|CG1902	9.91667			143949_at|scu	9.3			141484_at|CG10672	10.8			152531_at|Odc1	10.8
	155087_at|vlc	12.9			141480_at|CG2107	9.91667			154096_at|CG6903	9.3			154907_at|CG11309	10.8			152717_at|CG3835	10.7
	142825_s_at|gus	12.8			154562_at|CG7197	9.83333			144037_at|Irp-1B	8.9			144335_at|26-29-p	10.75			152336_at|DNaseII	10.7
	154482_at|CG9636	12.8			146652_at|CG17337	9.83333			147765_at|CG30410	8.9			153410_at|Hexo1	10.6875			150834_at|Obp99c	10.7
	143317_at|Ras85D	12.7			154150_at|Got1	9.81818			153314_at|eIF-3p66	8.9			141672_r_at|CG17597	10.625			153046_at|Spat	10.6667
	153509_at|p120ctn	12.7			154279_at|VhaAC39	9.75			145269_at|CG32495	8.9			152480_at|Vha36	10.625			151983_at|CG16936	10.6
	155053_at|Mlf	12.6			148717_at|CG10083	9.66667			141674_at|PyK	8.9			151795_at|Idh	10.6			152351_at|CG5288	10.6
	154761_at|cul-2	12.5			154165_at|Catsup	9.66667			142408_at|CG4729	8.8			151789_at|CG1140	10.4375			141450_at|Sodh-1	10.5
	141278_at|gw	12.5			154544_at|loj	9.66667			152501_at|Thiolase	8.8			153236_at|Fdh	10.4375			152903_at|CG6028	10.4
	141759_at|vap	12.5			153437_at|yip2	9.66667			143473_at|Su(P)	8.8			154110_at|CG12262	10.4375			146084_at|Aldh	10.4
	144016_at|NPC1	12.4			153968_at|SamDC	9.58333			153348_at|CG4769	8.8			143625_at|Vha14	10.375			151800_at|CG4847	10.4
	153960_at|lin19	12.4			154852_at|CG10639	9.58333			143911_at|ATPsyn-gamma	8.8			152003_at|CG9629	10.375			152569_at|CG11919	10.3333
	154246_at|dik	12.4			143716_at|Arf51F	9.5			144542_at|CG33080	8.8			144220_at|CG15261	10.3125			143691_at|Gip	10.3
	143735_at|MAPk-Ak2	12.3			151648_at|CalpB	9.5			153329_at|l(2)k14708	8.8			152209_at|CG5703	10.25			141703_at|CG9510	10.3
	153706_at|Slip1	12.3			154383_at|CG10602	9.5			154892_at|CG11208	8.77778			151393_s_at|CG18624	10.25			152669_at|pug	10.3
	153795_at|Kap-alpha3	12.2			150980_at|CG1970	9.5			141484_at|CG10672	8.7			153364_at|CG9232	10.1875			142350_at|yellow-f2	10.3
	152093_at|---	12			154294_at|CG1837	9.5			152781_at|Pgd	8.7			153128_at|CG4802	10.1875			154176_at|Tal	10.2
	154732_at|CG6454	12			154241_at|Indy	9.5			142499_at|colt	8.7			152211_at|CG6950	10.125			147237_at|Hex-C	10.2
	154475_at|d4	12			154860_at|stck	9.5			148901_at|CG4169	8.7			154279_at|VhaAC39	10.125			146724_at|Spn43Ab	10.2
	153311_at|Hsc70-5	12			153849_at|l(2)k09913	9.45455			150039_s_at|CG17556	8.7			152603_at|CG3415	10.0625			151835_at|CG14823	10.2
	154037_at|CG14722	12			153888_at|Ogt	9.41667			146911_at|CG12140	8.6			152323_at|CG8417	10.0625			153777_at|pyd3	10.1
	153739_at|cals	11.9			143317_at|Ras85D	9.41667			152076_at|CG1662	8.6			152837_at|CG4685	10			151876_at|Reg-2	10.1
	153494_at|Pp1-87B	11.9			143663_at|Trp1	9.41667			145415_at|CG9577	8.55556			143949_at|scu	10			142413_at|CG11314	10
	153996_at|me31B	11.9			151636_at|Sh3beta	9.41667			143150_at|Eno	8.5			141758_at|Sc2	10			151851_at|CG6206	9.8
	143597_at|Rac1	11.9			154968_at|CG5168	9.41667			144664_at|CG1444	8.5			143691_at|Gip	10			147793_at|CG4019	9.8
	154000_at|CG7139	11.9			153347_at|Gpdh	9.41667			152294_at|CG5577	8.5			153203_at|CG6178	10			144565_at|CG6067	9.8
	153815_at|Dnz1	11.9			151898_at|Kap-alpha1	9.33333			145332_at|CG7322	8.5			143358_at|Sod	9.9375			147959_at|CG13912	9.8
	153607_at|CG32016	11.9			152093_at|---	9.33333			153536_at|CG2713	8.5			155162_at|l(2)03709	9.9375			151841_at|CG8586	9.7
	154488_at|CG2316	11.8889			144169_at|CHIP	9.33333			152822_at|Pink1	8.5			141356_at|CG7430	9.9375			145897_at|CG9511	9.7
	152461_at|Adam	11.8			154275_at|CG12000	9.33333			143956_at|CG3760	8.5			153323_at|CG17896	9.9375			143877_at|Nurf-38	9.6
	154941_at|CG1962	11.8			147225_at|Cyp6a23	9.33333			144561_at|CG3011	8.5			154311_at|CG7461	9.9375			152511_at|Ela	9.6
	153698_at|Tif-IA	11.8			151803_at|Rab2	9.25			149079_at|Grasp65	8.5			146151_at|CG5362	9.93333			144220_at|CG15261	9.5
	154982_at|Tak1	11.8			152551_at|CG8974	9.25			145056_at|mRpL38	8.5			146746_at|Cyt-b5	9.875			142310_at|alpha-Est7	9.5
	153730_at|CG7222	11.7			153407_at|Ide	9.25			151789_at|CG1140	8.4			154574_at|CG9172	9.875			144520_at|CG16756	9.5
	154804_at|CG8232	11.7			153738_at|NTPase	9.25			144219_at|l(2)35Di	8.4			153437_at|yip2	9.875			147336_at|CG6426	9.5
	142605_at|CG33095	11.7			141434_at|CG13887	9.25			151810_at|p47	8.4			153339_at|CG7920	9.8125			152534_at|CG9331	9.4
	153946_at|CG2185	11.6			153945_at|CG7970	9.25			153309_at|CG6020	8.4			151851_at|CG6206	9.8125			147608_at|CG4302	9.4
	152566_at|CG9775	11.6			141776_at|CG12428	9.18182			151875_at|Sod2	8.4			151807_at|CG5590	9.8			152437_at|Idgf5	9.4
	153276_at|bip2	11.6			151629_at|l(2)s5379	9.16667			144559_at|CG3016	8.4			153596_at|Dip-C	9.75			144148_at|CG1315	9.33333
	154770_at|CG8289	11.6			153739_at|cals	9.16667			141664_at|Hsp60	8.4			153309_at|CG6020	9.75			141484_at|CG10672	9.3
	154514_at|Cortactin	11.6			153289_at|CG8446	9.16667			148168_at|CG32250	8.33333			150121_at|CG7998	9.75			145029_at|CG11134	9.3
	153976_at|Pak	11.6			153943_at|Ent1	9.16667			153945_at|CG7970	8.3			144219_at|l(2)35Di	9.6875			149914_at|smp-30	9.3
	151866_at|epsin-like	11.6			154677_at|pelo	9.08333			152584_at|CG7834	8.3			152584_at|CG7834	9.6875			153365_at|CG15825	9.3
	153681_at|Dek	11.6			151804_at|CG9836	9.08333			143422_at|Pros28.1	8.3			144608_at|CG3192	9.6875			152102_at|CG9119	9.3
	153904_at|CG5625	11.5556			154189_at|Syx7	9			144245_at|Rpt3	8.3			152743_at|CG14629	9.6875			152623_at|alpha-Est2	9.2
	146646_at|CG11665	11.5			154771_at|prel	9			154334_at|CG12079	8.3			147765_at|CG30410	9.625			150080_at|CG5840	9.1
	153857_at|plexA	11.5			154539_at|CG8444	9			143767_r_at|His3.3A	8.3			153031_at|Cyp9f2	9.625			151832_at|Oat	9.1
	154768_at|CG5482	11.4			155001_at|CG8321	9			147984_at|CG12091	8.3			143093_at|Cat	9.6			152925_at|CG9780	9.1
	155059_at|CG9318	11.4			154387_at|Aats-ile	8.91667			145263_at|Ucp4A	8.3			152078_at|CG9547	9.5625			153434_at|Hn	9.1
	142864_at|NUCB1	11.4			142825_s_at|gus	8.91667			144675_at|CG2254	8.2			153270_at|CG31063	9.5			152559_at|v	9.1
	142723_at|Arf79F	11.4			152461_at|Adam	8.91667			153270_at|CG31063	8.2			152151_at|CG3902	9.5			151946_at|Os9	9.1
	154226_at|ctp	11.4			153904_at|CG5625	8.91667			152631_at|th	8.2			147881_at|CG3683	9.5			152003_at|CG9629	9
	143670_at|Mad	11.4			151930_at|Vha26	8.91667			149683_at|CG6719	8.2			152350_at|CG1927	9.5			145178_at|CG9914	9
	151700_at|Tm1	11.4			144156_at|Vha13	8.91667			149322_at|CG1161	8.2			153326_at|CG9140	9.4375			141437_at|CG5618	9
	154471_at|par-6	11.4			154732_at|CG6454	8.83333			144147_at|BM-40-SPARC	8.2			155145_at|l(1)G0255	9.4375			141472_at|Glt	9
	153594_at|CG5284	11.3			146646_at|CG11665	8.83333			148557_at|mRpL2	8.2			152334_at|Tpi	9.375			142414_at|CG11315	9
	154824_at|CG2698	11.2			154675_at|l(1)G0155	8.83333			153410_at|Hexo1	8.1			149085_at|CG7433	9.375			145074_at|CG5321	9
	154637_at|CG31731	11.2			153610_at|CG3488	8.83333			154176_at|Tal	8.1			152456_at|Dat	9.3125			148573_at|CG7560	9
	152413_at|l(2)k05819	11.2			153649_at|CG8029	8.83333			144335_at|26-29-p	8.1			144430_at|CG3939	9.3125			146911_at|CG12140	8.9
	154631_at|CG31342	11.2			141260_at|CG4572	8.83333			141758_at|Sc2	8.1			141757_at|CG1907	9.3125			142709_s_at|CG6543	8.9
	143663_at|Trp1	11.1			151667_s_at|CG6673	8.83333			142784_at|CG9797	8.1			152304_at|CG11963	9.25			152584_at|CG7834	8.9
	151803_at|Rab2	11.1			153782_at|UGP	8.83333			153159_at|CG5903	8.1			152449_at|CG4389	9.13333			154229_at|CG10932	8.9
	141208_at|Cpr	11.1			141757_at|CG1907	8.83333			142977_at|CG7033	8.1			143877_at|Nurf-38	9.125			152455_at|CG7470	8.9
	153137_at|eIF5	11.1			141536_at|Sply	8.83333			151914_at|CG4390	8.1			151812_at|Oscp	9.125			144364_at|CG14630	8.9
	155027_at|RpII215	11.1			153962_at|CG3947	8.81818			142444_at|CG10778	8.1			153637_at|Prosbeta5	9.125			149568_at|CG9396	8.9
	151648_at|CalpB	11			143240_at|lt	8.75			155112_at|DyakCG7217	8.1			153373_at|CG8036	9.0625			152591_at|CG11395	8.9
	154521_at|Fur2	11			152415_at|CG3860	8.75			152395_at|CG12162	8.1			146732_at|CG1707	9.0625			152201_at|Tps1	8.9
	141203_at|CG2947	11			155162_at|l(2)03709	8.75			146699_at|Spn4	8			142243_at|CG9306	9.0625			152614_at|CG14021	8.9
	154503_at|Arc-p34	10.9			153013_at|CG33090	8.75			144247_at|Rpn11	8			142257_at|CG10863	9.0625			152709_at|Prat2	8.9
	146139_at|CG4972	10.9			141226_at|CG6904	8.75			152402_at|Nacalpha	8			154150_at|Got1	9.0625			145821_at|CG12512	8.88889
	151506_at|CG9047	10.9			141232_at|CG5044	8.75			142700_at|eca	8			146138_at|CG5390	9			153128_at|CG4802	8.8
	154030_at|fl(2)d	10.9			151641_at|CG31673	8.75			144105_at|CG3621	8			143175_at|Gapdh2	9			152151_at|CG3902	8.8
	141699_at|CG3056	10.9			141726_at|alien	8.66667			143766_i_at|His3.3A	8			146305_at|Vha68-2	8.9375			142196_at|Jheh1	8.8
	153654_at|CG4877	10.9			141745_at|Pect	8.66667			150210_at|CG6195	8			152227_at|CG6126	8.9375			142395_at|CG31839	8.8
	153842_at|ifc	10.8			142674_at|Snx6	8.66667			143908_at|Gs1l	8			154852_at|CG10639	8.9375			141527_at|Tequila	8.8
	151636_at|Sh3beta	10.8			154251_at|capt	8.66667			154323_at|CG6617	8			152351_at|CG5288	8.9375			149196_at|CG32444	8.8
	143706_at|Nca	10.8			154565_at|CG12007	8.66667			144984_at|CG2200	8			152458_at|Gyk	8.9375			151091_at|CG6503	8.8
	153985_at|CG8552	10.8			152449_at|CG4389	8.66667			151826_at|CG6783	7.9			151779_at|CG17292	8.9375			151795_at|Idh	8.7
	154591_at|put	10.8			141208_at|Cpr	8.58333			153339_at|CG7920	7.9			141639_at|CG1640	8.9375			152933_at|CG7529	8.7
	154924_at|Nipped-A	10.8			152298_at|Rheb	8.58333			145393_at|CG32528	7.9			144664_at|CG1444	8.875			141568_at|regucalcin	8.7
	154095_at|CG3107	10.8			153847_at|CG32446	8.58333			142982_at|Pros26.4	7.9			154334_at|CG12079	8.875			152178_at|SpdS	8.66667
	153102_at|CG31224	10.8			152050_at|CG10512	8.58333			150944_at|CG11334	7.9			151914_at|CG4390	8.875			154661_at|mdy	8.6
	141716_at|Sin3A	10.8			152458_at|Gyk	8.58333			149771_at|CG5167	7.9			146620_s_at|CG7546	8.875			151819_at|CG3301	8.6
	153438_at|sina	10.8			141531_at|CG5541	8.58333			142763_at|mtm	7.9			141536_at|Sply	8.875			141370_at|ppl	8.6
	154347_at|fal	10.7			152970_at|Aldh-III	8.58333			142560_at|awd	7.9			151797_at|fbp	8.875			145412_at|CG12656	8.6
	153449_at|eEF1delta	10.7			146151_at|CG5362	8.58333			154328_at|CG9666	7.9			152501_at|Thiolase	8.8125			151967_at|CG6415	8.6
	152077_at|CG11811	10.7			153857_at|plexA	8.5			144766_at|CG1354	7.8			154613_at|CG31937	8.8125			142408_at|CG4729	8.5
	146639_at|CG10465	10.7			154824_at|CG2698	8.5			143129_at|Dox-A2	7.8			144191_at|VhaSFD	8.8125			147472_at|Jheh2	8.5
	143928_at|Elf	10.7			154347_at|fal	8.5			154613_at|CG31937	7.8			147595_at|CG9350	8.8125			152603_at|CG3415	8.5
	153015_i_at|CG31534	10.7			153450_at|Nipsnap	8.5			143899_at|CoVa	7.8			153131_at|CG2915	8.8125			152233_at|glob1	8.5
	154159_at|CG8878	10.7			152357_at|Rab-RP4	8.5			143077_at|Arf72A	7.8			145956_at|CG5958	8.8125			144771_at|CG9691	8.5
	141726_at|alien	10.6			152480_at|Vha36	8.5			147725_at|asrij	7.8			153134_at|ND23	8.8125			145890_at|CG9498	8.5
	142948_at|Stat92E	10.6			152047_at|CG7601	8.5			152780_at|CG7967	7.8			141260_at|CG4572	8.8125			146486_at|CG13086	8.5
	155008_at|Chc	10.6			154941_at|CG1962	8.41667			146084_at|Aldh	7.7			154539_at|CG8444	8.8125			150297_at|CG5793	8.5
	153499_at|exd	10.6			141694_at|CG6016	8.41667			152323_at|CG8417	7.7			141746_at|Prx5037	8.8125			148834_at|CG17032	8.5
	143335_at|Scm	10.6			152541_at|CG5355	8.41667			153326_at|CG9140	7.7			143301_at|Pgk	8.75			143949_at|scu	8.4
	154148_at|eRF1	10.5			143093_at|Cat	8.41667			152211_at|CG6950	7.7			153790_at|l(1)G0334	8.75			144143_at|Idgf4	8.4
	151999_at|CG7028	10.5			153494_at|Pp1-87B	8.33333			152456_at|Dat	7.7			143608_at|Dbi	8.75			144561_at|CG3011	8.4
	154909_at|M(2)21AB	10.5			152771_at|CG11791	8.33333			144987_at|CG15717	7.7			152675_at|CG1681	8.75			142480_at|GstE9	8.4
	153772_at|Klc	10.5			152602_at|CG4196	8.33333			143878_at|Past1	7.7			154303_at|Scsalpha	8.6875			148837_at|CG17029	8.4
	143837_at|Lis-1	10.5			143858_at|crq	8.33333			144043_at|CG2658	7.7			143129_at|Dox-A2	8.6875			152900_at|Cyp6g1	8.4
	153658_at|CG14998	10.5			152547_at|Vps32	8.33333			144865_at|CG1597	7.7			152504_at|Pglym78	8.6875			152866_at|Cyp28d1	8.4
	154748_at|cdm	10.5			153336_at|Aats-asp	8.33333			150121_at|CG7998	7.6			141703_at|CG9510	8.6875			141458_at|CG9342	8.4
	141470_at|CG8963	10.5			153131_at|CG2915	8.33333			147049_at|rho-7	7.6			152534_at|CG9331	8.6875			142222_at|Cyp9b2	8.4
	152212_at|CG4287	10.4			153683_at|Rad23	8.25			141672_r_at|CG17597	7.6			153656_at|CG30499	8.6875			152148_at|CG33307	8.4
	154383_at|CG10602	10.4			154044_at|Ank	8.25			149195_at|ORMDL	7.6			148295_at|CG9953	8.6875			153945_at|CG7970	8.3
	153145_at|Tpr2	10.4			152738_at|msps	8.25			152209_at|CG5703	7.6			152081_at|CG5567	8.6875			153031_at|Cyp9f2	8.3
	154479_at|CG8507	10.4			153795_at|Kap-alpha3	8.25			144608_at|CG3192	7.6			144675_at|CG2254	8.625			148532_at|---	8.3
	153819_at|Nopp140	10.4			153996_at|me31B	8.25			143842_at|P5cr	7.6			152801_at|Got2	8.625			154431_at|Acer	8.3
	153968_at|SamDC	10.3			153698_at|Tif-IA	8.25			145592_at|RFeSP	7.6			142196_at|Jheh1	8.625			152083_at|CG15093	8.3
	141633_at|CG13384	10.3			143706_at|Nca	8.25			153144_at|Ahcy13	7.6			153576_at|CG6084	8.625			152347_at|CG11841	8.3
	141446_at|CG5447	10.3			153449_at|eEF1delta	8.25			147918_at|mRpL17	7.6			142421_at|CG6766	8.625			141671_s_at|CG17597	8.2
	151878_at|CG7364	10.3			141495_at|Mlc-c	8.25			142804_at|SC35	7.6			145178_at|CG9914	8.5625			151789_at|CG1140	8.2
	152771_at|CG11791	10.2			152665_at|GlcAT-S	8.25			153364_at|CG9232	7.5			153664_at|CG12746	8.5625			153323_at|CG17896	8.2
	150034_at|CG10326	10.2			143586_at|ATPsyn-beta	8.25			143691_at|Gip	7.5			143313_at|Pros29	8.5625			146138_at|CG5390	8.2
	153493_at|CG8400	10.2			150040_at|CG17556	8.25			152151_at|CG3902	7.5			154383_at|CG10602	8.5625			154613_at|CG31937	8.2
	153802_at|AP-1sigma	10.2			141768_at|Adk2	8.25			149345_at|CG12171	7.5			154275_at|CG12000	8.5625			149275_at|CG11739	8.2
	153395_at|bsk	10.2			146906_at|CG1599	8.25			153790_at|l(1)G0334	7.5			152426_at|CG5946	8.5625			154031_at|Chit	8.2
	151686_s_at|CaMKII	10.2			153267_at|eIF-4G	8.16667			147793_at|CG4019	7.5			144766_at|CG1354	8.5			143842_at|P5cr	8.2
	153232_at|CG33298	10.2			152284_at|cpa	8.16667			147870_at|CG13585	7.5			141501_at|CG30382	8.5			149771_at|CG5167	8.2
	141508_at|CG11247	10.2			154621_at|CG17273	8.16667			144350_at|CG5254	7.5			154223_at|Trip1	8.5			142453_at|GNBP3	8.2
	152297_at|hpo	10.2			141639_at|CG1640	8.16667			154364_at|CG4365	7.5			153110_at|Int6	8.5			154061_at|CG5171	8.2
	151586_at|CG7369	10.2			154873_at|CG3209	8.16667			142669_at|Ost48	7.5			153158_at|cl	8.5			152950_at|CG3239	8.2
	154416_at|CG5208	10.2			152911_at|desat1	8.16667			141643_at|Plap	7.5			152233_at|glob1	8.5			142219_at|Ance-4	8.2
	149711_at|glo	10.2			155150_at|---	8.16667			154731_at|aralar1	7.5			152919_at|CG11455	8.5			152323_at|CG8417	8.1
	145511_at|CG3164	10.1			143175_at|Gapdh2	8.16667			142756_at|CG2076	7.5			149187_at|VhaM9.7-2	8.5			145956_at|CG5958	8.1
	141495_at|Mlc-c	10.1			142196_at|Jheh1	8.16667			149213_at|CG7145	7.4			143871_at|ATPsyn-d	8.4375			143608_at|Dbi	8.1
	154446_at|Cont	10.1			147472_at|Jheh2	8.16667			152965_at|CG6180	7.4			148634_at|l(3)neo18	8.4375			144675_at|CG2254	8.1
	143861_at|didum	10.1			153410_at|Hexo1	8.16667			143980_at|Elongin-B	7.4			152393_at|CG9512	8.4375			152208_at|Fkbp13	8.1
	155078_at|Rab8	10.1			155059_at|CG9318	8.08333			149774_at|CG17202	7.4			152070_at|CG10992	8.375			150697_at|CG31075	8.1
	153645_at|Su(var)3-9	10.1			143879_at|Rab1	8.08333			152961_at|betaggt-II	7.4			145716_at|CG17593	8.375			153150_at|CG11899	8.1
	151645_at|lola	10.1			154011_at|VhaM9.7-1	8.08333			146746_at|Cyt-b5	7.3			152717_at|CG3835	8.375			151802_at|Adh	8.1
	152398_at|CG10631	10.1			151931_at|Rab7	8.08333			144191_at|VhaSFD	7.3			151800_at|CG4847	8.375			153339_at|CG7920	8
	154626_at|Hsc70Cb	10.1			154091_at|CG11050	8.08333			143903_at|Surf4	7.3			155030_at|Mtch	8.375			154852_at|CG10639	8
	153989_at|CG11092	10.1			142415_at|Nmda1	8.08333			144430_at|CG3939	7.3			146960_at|CG12338	8.375			151937_at|CG1213	8
	144169_at|CHIP	10			145385_at|Sec61gamma	8.08333			152504_at|Pglym78	7.3			153348_at|CG4769	8.3125			152325_at|Lsd-1	8
	152665_at|GlcAT-S	10			154858_at|sar1	8.08333			154351_at|Pros45	7.3			152208_at|Fkbp13	8.3125			152752_at|CG3829	8
	143879_at|Rab1	10			151016_at|CG9603	8.08333			143786_at|HLH106	7.3			141712_at|CDase	8.3125			152494_at|Cyp6w1	8
	154448_at|Art1	10			152919_at|CG11455	8.08333			153246_at|CG12107	7.3			145269_at|CG32495	8.25			152837_at|CG4685	7.9
	152390_at|CG3825	10			152350_at|CG1927	8.08333			145141_at|CG9245	7.3			153168_at|Pdsw	8.25			153576_at|CG6084	7.9
	151472_at|CG5053	10			144223_at|CG4930	8.08333			153283_at|ATPsyn-b	7.3			152036_at|NP15.6	8.25			152568_at|CG2493	7.9
	153916_at|CG17486	10			153960_at|lin19	8			154336_at|AnnX	7.3			149768_s_at|Cyp9f2	8.25			141436_at|CG3505	7.9
	154688_at|CG8176	10			154148_at|eRF1	8			150569_at|CG11857	7.3			144097_at|Mgstl	8.25			149855_at|Adgf-D	7.9
	154787_at|Abi	10			151844_at|DyakCG10731	8			154510_at|epsilonCOP	7.3			142505_at|eIF-3p40	8.25			154410_at|CG12030	7.8
	154356_at|G-salpha60A	9.9			143638_at|eff	8			146847_at|CG8235	7.3			151853_at|CG8790	8.25			151805_at|Reg-3	7.8
	141524_at|CG10289	9.9			154389_at|CG11490	8			153203_at|CG6178	7.2			152059_at|CG1516	8.25			149838_at|CG14375	7.8
	152373_at|CG9373	9.9			153451_at|Cdk5	8			153236_at|Fdh	7.2			149399_at|CG1041	8.2			146740_at|sPLA2	7.8
	153791_at|l(2)NC136	9.9			151794_at|TMS1	8			142661_at|Vha100-2	7.2			148244_at|CG33523	8.1875			154206_at|CG5315	7.7
	141454_at|CG13213	9.9			153725_at|CG3662	8			143877_at|Nurf-38	7.2			155112_at|DyakCG7217	8.1875			153069_at|CG15096	7.7
	154818_at|CG16940	9.9			153399_at|CG11306	8			146891_at|Updo	7.2			142133_at|ferrochelatase	8.1875			147319_at|CG8317	7.7
	143828_at|Apc	9.9			152059_at|CG1516	8			148234_at|CG10575	7.2			152383_at|Argk	8.1875			144814_at|CG1628	7.7
	154771_at|prel	9.8			152276_at|wal	8			152743_at|CG14629	7.2			150013_at|mRpS33	8.1875			150588_at|CG11909	7.7
	152284_at|cpa	9.8			152233_at|glob1	8			152051_at|eIF-2alpha	7.2			154901_at|mtTFB1	8.1875			147450_at|CG5493	7.7
	151609_at|---	9.8			154503_at|Arc-p34	7.91667			144540_at|cv	7.2			149275_at|CG11739	8.1875			145647_at|Cyp309a1	7.7
	153230_at|bbx	9.8			154448_at|Art1	7.91667			146771_at|CG1882	7.2			141480_at|CG2107	8.1875			152480_at|Vha36	7.6
	155076_at|CG5174	9.8			154751_at|lace	7.91667			144212_at|Kr-h2	7.2			143870_at|ATPsyn-Cf6	8.1875			145637_at|CG3609	7.6
	153155_at|TER94	9.8			152119_at|sda	7.91667			153009_at|CG6094	7.2			144143_at|Idgf4	8.1875			142434_at|Tina-1	7.6
	143162_at|flw	9.8			154887_at|CG5938	7.91667			148076_at|CG1893	7.2			153946_at|CG2185	8.1875			149615_at|CG3940	7.6
	141224_at|CG6838	9.8			154660_at|CG3887	7.91667			142512_at|CG4603	7.2			141214_at|Gdi	8.125			142356_at|RfaBp	7.6
	153686_at|Pp2A-29B	9.8			141625_at|Syb	7.91667			148327_at|sec63	7.2			155056_at|Prosbeta2	8.125			149882_at|CG31326	7.6
	153251_at|fat2	9.8			142736_s_at|Hmgs	7.91667			143804_at|dod	7.2			144787_at|l(1)G0230	8.125			153373_at|CG8036	7.5
	154667_at|D1	9.8			146009_at|CG8498	7.91667			154689_at|CG7789	7.2			142785_at|mRpS9	8.125			149768_s_at|Cyp9f2	7.5
	153045_at|CG14650	9.8			141356_at|CG7430	7.91667			143993_at|CG14815	7.11111			154892_at|CG11208	8.0625			152965_at|CG6180	7.5
	150980_at|CG1970	9.7			149399_at|CG1041	7.91667			152480_at|Vha36	7.1			151875_at|Sod2	8.0625			152407_at|CG11198	7.5
	152602_at|CG4196	9.7			153203_at|CG6178	7.91667			152261_at|CAH1	7.1			152261_at|CAH1	8.0625			152571_at|CG7966	7.5
	151844_at|DyakCG10731	9.7			153829_at|auxillin	7.83333			154332_at|CG12876	7.1			145029_at|CG11134	8.0625			142716_at|CG9436	7.5
	154751_at|lace	9.7			153730_at|CG7222	7.83333			151812_at|Oscp	7.1			150697_at|CG31075	8.0625			153098_at|CG16705	7.5
	141526_at|Hsf	9.7			152077_at|CG11811	7.83333			152008_at|CG2246	7.1			141298_at|CG9186	8.0625			153428_at|ade5	7.5
	149675_at|CG6672	9.7			150034_at|CG10326	7.83333			153435_at|blw	7.1			153504_at|CG33138	8.0625			152181_at|CG9631	7.5
	153522_at|cta	9.7			151611_at|Klp31E	7.83333			145178_at|CG9914	7.1			152121_s_at|CG5009	8.0625			152200_at|ry	7.44444
	153831_at|CG5149	9.7			152048_at|CG6230	7.83333			154410_at|CG12030	7.1			144663_at|CG18624	8.0625			148265_at|CG10467	7.4
	143311_at|PpV	9.7			151378_at|mRpL33	7.83333			146493_at|CG9987	7.1			151947_at|CG8818	8			141406_at|CG8129	7.4
	153942_at|CG8924	9.7			153540_at|hk	7.83333			154195_at|SdhB	7.1			145332_at|CG7322	8			146461_at|CG10621	7.4
	154413_at|CG5720	9.7			152129_at|CG7207	7.83333			150225_at|Arc42	7.1			147793_at|CG4019	8			152329_at|CG11967	7.4
	153321_at|Rga	9.7			155126_at|CG17667	7.83333			143800_at|CG5861	7.1			142335_at|CG9391	8			147029_s_at|CG30035	7.4
	154675_at|l(1)G0155	9.6			151885_at|CG9009	7.83333			148739_at|endos	7.1			151903_at|und	8			152054_at|CG3775	7.4
	143858_at|crq	9.6			153299_at|spict	7.83333			142781_at|CG14648	7.1			154873_at|CG3209	8			152970_at|Aldh-III	7.3
	151611_at|Klp31E	9.6			154349_at|CG8814	7.83333			153648_at|Bap60	7.1			142139_at|CG3699	8			152458_at|Gyk	7.3
	152048_at|CG6230	9.6			153186_at|Ugt86Da	7.83333			142454_at|mRpL12	7.1			146973_at|CG7712	8			151779_at|CG17292	7.3
	143145_at|egl	9.6			155053_at|Mlf	7.75			148067_at|mRpS35	7.1			154936_at|Dip-B	8			146013_at|CG8360	7.3
	151861_at|CG8230	9.6			142864_at|NUCB1	7.75			154228_at|sop	7.1			153935_at|CG6370	8			148166_at|CG1319	7.3
	141205_at|CG18177	9.6			151999_at|CG7028	7.75			154249_at|CG11127	7.1			153782_at|UGP	8			144831_at|CG17333	7.3
	153659_at|Adf1	9.6			151904_at|CG31012	7.75			153183_at|l(2)05070	7			154031_at|Chit	8			144350_at|CG5254	7.3
	151692_i_at|CG31301	9.6			154054_at|CG8379	7.75			147006_at|CG13220	7			153159_at|CG5903	7.9375			144369_at|CG11378	7.3
	154911_at|SF2	9.6			154214_at|Start1	7.75			154508_at|Sec61alpha	7			142982_at|Pros26.4	7.9375			146978_s_at|Cyp12d1-d	7.3
	152987_at|CG5077	9.6			155049_at|l(3)05822	7.75			145187_at|CG9947	7			143842_at|P5cr	7.9375			147768_at|CG11079	7.3
	154135_at|Myb	9.6			153310_at|CG3436	7.75			145383_at|CG14213	7			142627_at|CG4598	7.9375			152816_at|CG2233	7.3
	153256_at|Marf	9.6			154170_at|CG5854	7.75			154212_at|HP1c	7			141412_at|CG6891	7.9375			145733_at|CG10031	7.3
	153788_at|CG10354	9.6			142295_at|tsr	7.75			144588_at|CG15897	7			144586_at|CG3566	7.9375			154110_at|CG12262	7.2
	142899_at|CG5694	9.6			141691_at|spz	7.75			154009_at|mRpL16	7			153336_at|Aats-asp	7.9375			152456_at|Dat	7.2
	152551_at|CG8974	9.5			153894_at|CG11897	7.75			148694_at|Syx13	7			152357_at|Rab-RP4	7.9375			141536_at|Sply	7.2
	152415_at|CG3860	9.5			151522_at|Mdh	7.75			152970_at|Aldh-III	6.9			143911_at|ATPsyn-gamma	7.875			152081_at|CG5567	7.2
	154011_at|VhaM9.7-1	9.5			142844_at|Gint3	7.75			143093_at|Cat	6.9			146372_at|CG17331	7.875			152120_at|Cyp6d5	7.2
	149061_at|CG9330	9.5			152416_at|Ent2	7.75			154110_at|CG12262	6.9			142390_at|CG3246	7.875			151882_at|CG3270	7.2
	141309_at|CG7611	9.5			142537_at|GstE6	7.75			141682_at|cathD	6.9			147789_at|CG17280	7.875			153144_at|Ahcy13	7.2
	155005_at|CG18292	9.5			152515_at|Pgi	7.75			152613_at|CG11255	6.9			147691_at|CG2852	7.875			153200_at|---	7.2
	151683_at|CG14648	9.5			152081_at|CG5567	7.75			149779_at|CG18549	6.9			151897_at|Gclm	7.875			151909_at|CG6287	7.2
	151935_at|Tl	9.5			149187_at|VhaM9.7-2	7.75			145431_at|CG1702	6.9			143729_at|FK506-bp2	7.875			153398_at|CG1092	7.2
	154980_at|CG11596	9.5			152566_at|CG9775	7.66667			152078_at|CG9547	6.9			153616_at|CG10425	7.875			153461_at|CG30503	7.2
	146135_at|CG5604	9.5			142948_at|Stat92E	7.66667			152385_at|Aats-gln	6.9			143912_at|ATPCL	7.875			151894_at|CG18249	7.2
	151652_at|CG5098	9.5			151609_at|---	7.66667			142335_at|CG9391	6.9			154858_at|sar1	7.875			143239_at|Lsp2	7.2
	153261_at|CG4853	9.5			152814_at|Rho1	7.66667			152455_at|CG7470	6.9			142700_at|eca	7.8125			142499_at|colt	7.1
	154620_at|CG6181	9.5			141296_at|CG14536	7.66667			154671_at|CG10184	6.9			145431_at|CG1702	7.8125			152350_at|CG1927	7.1
	154311_at|CG7461	9.4			142251_at|for	7.66667			153373_at|CG8036	6.9			141390_at|l(2)44DEa	7.8125			152393_at|CG9512	7.1
	141694_at|CG6016	9.4			152864_at|CG13603	7.66667			151909_at|CG6287	6.9			153792_at|granny-smith	7.8125			152059_at|CG1516	7.1
	152814_at|Rho1	9.4			145716_at|CG17593	7.66667			150263_at|att-ORFA	6.9			153351_at|CG8331	7.8125			154024_at|Nap1	7.1
	141629_at|eIF-4E	9.4			153169_at|CG9917	7.66667			142148_at|CG18811	6.9			141815_at|PHGPx	7.8125			149722_at|CG18547	7.1
	152595_at|DIP2	9.4			148295_at|CG9953	7.66667			149290_at|CG9769	6.9			153436_at|CG32795	7.8125			154567_at|CG8132	7.1
	150990_at|CG17471	9.4			148950_at|frc	7.66667			154977_at|Spase25	6.9			153847_at|CG32446	7.8125			152294_at|CG5577	7.1
	145453_at|CG1518	9.4			149085_at|CG7433	7.66667			149705_at|CG14721	6.9			148955_at|CG7603	7.75			154652_at|alpha-Est1	7.1
	148635_at|CG5642	9.4			152291_at|CG14290	7.66667			154912_at|TFAM	6.9			142310_at|alpha-Est7	7.75			144852_at|CG15202	7.1
	153821_at|CG16975	9.4			142558_s_at|Eb1	7.58333			155161_at|Sry-delta	6.9			148532_at|---	7.75			155150_at|---	7
	153811_at|lolal	9.4			141526_at|Hsf	7.58333			145395_at|CG12703	6.88889			148957_at|CG7580	7.75			146746_at|Cyt-b5	7
	144051_at|ari-2	9.4			154734_at|CG7456	7.58333			153128_at|CG4802	6.8			154053_at|Trxr-1	7.6875			153782_at|UGP	7
	153407_at|Ide	9.33333			141647_at|CG12016	7.58333			151807_at|CG5590	6.8			144561_at|CG3011	7.6875			149607_at|CG12811	7
	154562_at|CG7197	9.3			153983_at|CG4880	7.58333			143625_at|Vha14	6.8			153283_at|ATPsyn-b	7.6875			143649_at|RpS4	7
	143638_at|eff	9.3			152454_at|Ugt	7.58333			141390_at|l(2)44DEa	6.8			142661_at|Vha100-2	7.6875			152147_at|CG4592	7
	151904_at|CG31012	9.3			151622_at|CG7331	7.58333			141550_at|CG2970	6.8			146891_at|Updo	7.6875			141697_at|Gel	7
	141296_at|CG14536	9.3			154999_at|grp	7.58333			153792_at|granny-smith	6.8			147006_at|CG13220	7.6875			146190_at|CG17124	7
	151658_at|Amph	9.3			154685_at|Tom20	7.58333			144831_at|CG17333	6.8			149949_at|mRpL9	7.6875			152679_at|CG10550	7
	150977_at|CG2165	9.3			143535_at|Hnf4	7.58333			147968_at|CG9153	6.8			153049_at|DppIII	7.6875			145975_at|CG13795	7
	153241_at|CG32425	9.3			143104_at|cni	7.58333			142786_at|CG2943	6.8			141231_at|Rpn7	7.6875			152063_at|CG4716	7
	154289_at|Sgt	9.3			153817_at|sqh	7.58333			153618_at|Dmn	6.8			154830_at|CG5112	7.6875			144893_at|CG9360	7
	143715_at|Arf102F	9.3			154661_at|mdy	7.58333			142716_at|CG9436	6.8			152066_at|Aats-asn	7.6875			144320_at|CG16873	7
	153868_at|CG2813	9.3			153281_at|Gmd	7.58333			152339_at|mri	6.8			142853_at|Prosalpha7	7.6875			150335_at|fit	7
	142283_at|Nrx-IV	9.3			153769_at|AcCoAS	7.58333			152197_at|CG10908	6.8			154728_at|mRpS7	7.6875			152090_at|CG6746	6.9
	152863_at|CG7565	9.3			152304_at|CG11963	7.58333			149673_at|CG6666	6.8			154024_at|Nap1	7.6875			152227_at|CG6126	6.9
	151515_at|PpD3	9.3			151807_at|CG5590	7.58333			154209_at|RnpS1	6.8			152545_at|ERp60	7.6875			152801_at|Got2	6.9
	142553_at|CG5640	9.3			155074_at|CG7530	7.58333			144047_at|eIF2B-beta	6.8			146029_at|CG13393	7.6875			152261_at|CAH1	6.9
	154932_at|CG11851	9.3			154574_at|CG9172	7.58333			143788_at|Pcmt	6.8			154457_at|CG8386	7.6875			142335_at|CG9391	6.9
	153135_at|Dsp1	9.3			153509_at|p120ctn	7.5			145761_at|CG15440	6.8			151410_at|Neb-cGP	7.6875			145666_at|CG2862	6.9
	141776_at|CG12428	9.2			154909_at|M(2)21AB	7.5			145098_at|Lsd-2	6.8			146013_at|CG8360	7.6875			152613_at|CG11255	6.9
	153610_at|CG3488	9.2			149061_at|CG9330	7.5			144814_at|CG1628	6.8			146652_at|CG17337	7.6875			151760_at|CG8468	6.9
	143586_at|ATPsyn-beta	9.2			151658_at|Amph	7.5			147472_at|Jheh2	6.7			145811_at|CG8680	7.6875			143572_at|Cyp4d1	6.9
	154734_at|CG7456	9.2			147105_at|CG8594	7.5			146620_s_at|CG7546	6.7			154165_at|Catsup	7.6875			143387_at|tsl	6.9
	152138_at|CG14967	9.2			152035_at|CG10373	7.5			152070_at|CG10992	6.7			144156_at|Vha13	7.6875			152332_at|CG2145	6.9
	150976_at|CG2177	9.2			154636_at|CG8004	7.5			149126_at|Las	6.7			144771_at|CG9691	7.6875			144542_at|CG33080	6.9
	151711_at|bc10	9.2			142545_at|RpA-70	7.5			152185_at|CG11876	6.7			153450_at|Nipsnap	7.6875			141414_at|CG9886	6.9
	148548_at|l(3)01239	9.2			153351_at|CG8331	7.5			151370_at|CG17776	6.7			149213_at|CG7145	7.625			152999_at|Iris	6.9
	141486_at|Csp	9.2			145531_at|CG4164	7.5			141345_at|CG5844	6.7			152965_at|CG6180	7.625			150482_at|CG13607	6.9
	153957_at|CG9044	9.2			152368_at|Irc	7.5			141547_at|Zw	6.7			152008_at|CG2246	7.625			151955_at|Bc	6.9
	153549_at|pr	9.2			152426_at|CG5946	7.5			143662_at|Cdc37	6.7			154195_at|SdhB	7.625			151826_at|CG6783	6.8
	154792_at|pnut	9.2			154284_at|Ilk	7.5			153168_at|Pdsw	6.7			153368_at|fat-spondin	7.625			142257_at|CG10863	6.8
	153130_at|CG9992	9.2			144122_at|UbcD10	7.5			154786_at|CG18522	6.7			150467_at|CG10219	7.625			141712_at|CDase	6.8
	154697_at|Iap2	9.2			143687_at|Arp87C	7.5			153362_at|Coprox	6.7			153849_at|l(2)k09913	7.625			144097_at|Mgstl	6.8
	151655_at|CG8443	9.2			154695_at|CG12130	7.5			143369_at|sta	6.7			152648_at|CG2736	7.625			151897_at|Gclm	6.8
	143229_at|pho	9.2			154843_at|Atg18	7.5			146305_at|Vha68-2	6.6			148410_at|CG6776	7.625			142560_at|awd	6.8
	153803_at|osp	9.2			154936_at|Dip-B	7.5			141214_at|Gdi	6.6			154730_at|CG9485	7.625			142746_at|Men	6.8
	152298_at|Rheb	9.1			142257_at|CG10863	7.5			153664_at|CG12746	6.6			144079_at|Roc1a	7.625			154747_at|Jheh3	6.8
	142251_at|for	9.1			151779_at|CG17292	7.5			144883_at|CG11699	6.6			145612_at|NPC2	7.625			144829_at|CG15209	6.8
	152538_at|Scs-fp	9.1			154176_at|Tal	7.5			149949_at|mRpL9	6.6			142510_at|EfTuM	7.5625			154350_at|CG8525	6.8
	151657_at|CG18604	9.1			143597_at|Rac1	7.41667			153578_at|Tudor-SN	6.6			149771_at|CG5167	7.5625			150424_at|CG6733	6.8
	143808_at|mbc	9.1			142723_at|Arf79F	7.41667			148648_at|CG4300	6.6			141682_at|cathD	7.5625			141617_at|128up	6.8
	141283_at|cup	9.1			153493_at|CG8400	7.41667			146211_at|CG33129	6.6			150080_at|CG5840	7.5625			150576_at|CG10514	6.8
	152917_at|CG7628	9.1			153802_at|AP-1sigma	7.41667			151769_at|CG3731	6.6			153354_at|CG5325	7.5625			142954_at|CG5773	6.8
	153475_at|pyd	9.1			149675_at|CG6672	7.41667			141317_at|CG12321	6.6			153344_at|CG10664	7.5625			153828_at|CG15828	6.8
	141803_at|olf186-F	9.1			150977_at|CG2165	7.41667			153368_at|fat-spondin	6.6			152636_at|CG14235	7.5625			152931_at|CG10131	6.8
	143565_at|Eip63E	9.1			153377_at|CdsA	7.41667			146154_at|DyakCG17768	6.6			153932_at|CG5177	7.5625			150261_at|CG4335	6.8
	153716_at|CG11376	9.1			153684_at|cact	7.41667			154013_at|CG1753	6.6			151641_at|CG31673	7.5625			153405_at|CG31778	6.8
	153468_at|nrv1	9			143625_at|Vha14	7.41667			143871_at|ATPsyn-d	6.6			154284_at|Ilk	7.5625			151877_at|CG5707	6.77778
	148717_at|CG10083	9			152115_at|CG1309	7.41667			152201_at|Tps1	6.6			147225_at|Cyp6a23	7.5625			144037_at|Irp-1B	6.7
	155162_at|l(2)03709	9			152590_at|CG9779	7.41667			150021_at|CG14899	6.6			144105_at|CG3621	7.5			141672_r_at|CG17597	6.7
	141745_at|Pect	9			143870_at|ATPsyn-Cf6	7.41667			152539_at|CG2046	6.6			147049_at|rho-7	7.5			146151_at|CG5362	6.7
	151479_at|CG6448	9			154404_at|CG10417	7.33333			152036_at|NP15.6	6.6			149195_at|ORMDL	7.5			150121_at|CG7998	6.7
	153490_at|Pomp	9			154761_at|cul-2	7.33333			153956_at|Ard1	6.6			148265_at|CG10467	7.5			143871_at|ATPsyn-d	6.7
	141706_at|CG1371	9			155008_at|Chc	7.33333			149797_at|CG12279	6.6			154229_at|CG10932	7.5			153504_at|CG33138	6.7
	153972_at|CG32164	9			141633_at|CG13384	7.33333			153139_at|CG7950	6.6			145368_at|CG12203	7.5			144586_at|CG3566	6.7
	142482_at|CLIP-190	9			141629_at|eIF-4E	7.33333			141795_at|CG31120	6.6			145637_at|CG3609	7.5			154730_at|CG9485	6.7
	141802_at|vimar	9			153241_at|CG32425	7.33333			145384_at|CG12237	6.6			152482_at|CG11594	7.5			149681_at|CG17734	6.7
	154564_at|Cbp80	9			151479_at|CG6448	7.33333			144972_at|CG4400	6.6			152933_at|CG7529	7.5			148447_at|Dhpr	6.7
	154453_at|unc-13	9			153490_at|Pomp	7.33333			144993_at|CG2453	6.6			143547_at|Crc	7.5			151301_at|CG13315	6.7
	141480_at|CG2107	8.9			153882_at|RhoGDI	7.33333			145080_at|CG14407	6.6			152407_at|CG11198	7.5			151806_at|Oatp74D	6.7
	154054_at|CG8379	8.9			154298_at|RhoBTB	7.33333			145159_at|CG16952	6.6			153150_at|CG11899	7.5			152766_at|Lsp1beta	6.7
	154128_at|CalpA	8.9			154281_at|p38b	7.33333			153140_at|Rrp4	6.6			153187_at|CG5335	7.5			152394_at|CG5428	6.7
	152214_at|CG3262	8.9			154406_at|CG8229	7.33333			150691_at|CG5500	6.6			143903_at|Surf4	7.4375			146257_at|CG14935	6.7
	152946_at|Uba1	8.9			144170_at|CSN3	7.33333			155150_at|---	6.5			152120_at|Cyp6d5	7.4375			149663_at|Ugt86Dd	6.7
	145522_at|CG11555	8.9			141355_at|CG8031	7.33333			144220_at|CG15261	6.5			144118_at|CG14818	7.4375			145030_at|CG11151	6.6
	153213_at|CG7324	8.9			151982_at|CG8481	7.33333			151903_at|und	6.5			152571_at|CG7966	7.4375			144608_at|CG3192	6.6
	141666_at|CG11844	8.9			153688_at|CG16718	7.33333			142627_at|CG4598	6.5			154860_at|stck	7.4375			145431_at|CG1702	6.6
	148095_at|CG17737	8.9			152401_at|CG7830	7.33333			148265_at|CG10467	6.5			142165_at|CG3625	7.4375			150167_at|---	6.6
	151662_s_at|stc	8.9			154495_at|CG6459	7.33333			152801_at|Got2	6.5			143012_at|Rpt1	7.375			146339_at|CG9267	6.6
	151577_at|CG11357	8.9			153496_at|Ggamma1	7.33333			145029_at|CG11134	6.5			148901_at|CG4169	7.375			141242_at|CG15092	6.6
	152465_at|Zn72D	8.9			141390_at|l(2)44DEa	7.33333			154952_at|CG6859	6.5			141317_at|CG12321	7.375			149528_at|CG9837	6.6
	153674_at|Mo25	8.9			153616_at|CG10425	7.33333			149914_at|smp-30	6.5			141568_at|regucalcin	7.375			155162_at|l(2)03709	6.5
	154294_at|CG1837	8.8			154778_at|CG1275	7.33333			152843_at|Orct	6.5			153777_at|pyd3	7.375			153168_at|Pdsw	6.5
	154539_at|CG8444	8.8			146619_i_at|Mgstl	7.33333			153296_at|Inos	6.5			152401_at|CG7830	7.375			149399_at|CG1041	6.5
	142674_at|Snx6	8.8			153031_at|Cyp9f2	7.33333			150467_at|CG10219	6.5			154791_at|CG14207	7.375			144147_at|BM-40-SPARC	6.5
	152547_at|Vps32	8.8			142796_at|CG8306	7.33333			145309_at|Aats-his	6.5			142434_at|Tina-1	7.375			154495_at|CG6459	6.5
	151378_at|mRpL33	8.8			153799_at|MED26	7.25			154782_at|metl	6.5			145327_s_at|CG6891	7.375			152556_at|Ser7	6.5
	151669_at|Gap1	8.8			154000_at|CG7139	7.25			142639_at|CG16953	6.5			143658_at|mtacp1	7.375			142199_at|CG3091	6.5
	143843_at|Rab11	8.8			153395_at|bsk	7.25			149279_at|eIF3-S10	6.5			141768_at|Adk2	7.375			148414_at|CG6638	6.5
	155025_at|ergic53	8.8			152390_at|CG3825	7.25			154023_at|Pros54	6.5			152336_at|DNaseII	7.375			144227_at|CG15293	6.5
	153502_at|e(r)	8.8			153522_at|cta	7.25			150697_at|CG31075	6.5			153468_at|nrv1	7.375			145896_at|CG9508	6.5
	154003_at|exba	8.8			153831_at|CG5149	7.25			146078_at|Ggamma30A	6.5			154661_at|mdy	7.375			153410_at|Hexo1	6.4
	142582_at|tws	8.8			152138_at|CG14967	7.25			144003_at|CG4406	6.5			141437_at|CG5618	7.375			153326_at|CG9140	6.4
	144125_at|Pten	8.8			154128_at|CalpA	7.25			141559_at|sec5	6.5			150980_at|CG1970	7.375			149085_at|CG7433	6.4
	151554_at|CG7029	8.8			144183_at|EDTP	7.25			153332_at|CG12151	6.5			143150_at|Eno	7.3125			146620_s_at|CG7546	6.4
	154250_at|ebi	8.8			154741_at|CycC	7.25			144868_at|CG11752	6.5			153956_at|Ard1	7.3125			141260_at|CG4572	6.4
	154133_at|CG15817	8.8			142975_at|Myo31DF	7.25			145563_at|Tango14	6.5			141637_at|CG5721	7.3125			152121_s_at|CG5009	6.4
	154856_at|CG14764	8.8			153220_at|Fpps	7.25			144164_at|MED18	6.5			153198_at|CG7382	7.3125			143911_at|ATPsyn-gamma	6.4
	143223_at|crp	8.8			149138_at|CG4858	7.25			147946_at|CG13890	6.44444			146619_i_at|Mgstl	7.3125			152253_at|CG12582	6.4
	154165_at|Catsup	8.7			152208_at|Fkbp13	7.25			141757_at|CG1907	6.4			143657_at|OstStt3	7.3125			142842_at|CG1532	6.4
	154544_at|loj	8.7			152120_at|Cyp6d5	7.25			146151_at|CG5362	6.4			153260_at|Mipp1	7.3125			151972_at|CG8206	6.4
	152119_at|sda	8.7			152507_at|sax	7.16667			152276_at|wal	6.4			151349_at|sun	7.3125			153318_at|bgm	6.4
	153540_at|hk	8.7			154475_at|d4	7.16667			155145_at|l(1)G0255	6.4			145684_at|CG17224	7.3125			141780_at|Cyp9c1	6.4
	153882_at|RhoGDI	8.7			154982_at|Tak1	7.16667			141703_at|CG9510	6.4			153765_at|poly	7.3125			152172_at|CG1544	6.4
	151973_at|CG18815	8.7			153230_at|bbx	7.16667			148955_at|CG7603	6.4			153769_at|AcCoAS	7.3125			152673_at|cry	6.4
	141732_at|puc	8.7			152595_at|DIP2	7.16667			147881_at|CG3683	6.4			152551_at|CG8974	7.3125			146569_at|CG9259	6.4
	146134_at|CG4946	8.7			151669_at|Gap1	7.16667			146489_at|Pax	6.4			152253_at|CG12582	7.3125			145480_at|Cyp6t1	6.4
	154485_at|kel	8.7			151973_at|CG18815	7.16667			151851_at|CG6206	6.4			145592_at|RFeSP	7.25			141420_at|CG13360	6.4
	154703_at|CG31637	8.7			150547_at|bai	7.16667			147595_at|CG9350	6.4			154410_at|CG12030	7.25			145235_at|CG5162	6.4
	151467_at|emb	8.7			152000_at|CHOp24	7.16667			148160_at|CG1265	6.4			154396_at|Aats-phe	7.25			151480_at|GNBP2	6.4
	150965_at|CG2219	8.7			152346_s_at|CG7927	7.16667			146138_at|CG5390	6.4			142705_at|Pros26	7.25			150368_at|CG13845	6.4
	154517_at|Vap-33-1	8.7			142659_at|l(2)k14710	7.16667			148469_at|path	6.4			152788_at|Aats-thr	7.25			153440_at|Yp2	6.4
	151511_r_at|dom	8.7			149467_at|CG2791	7.16667			153541_at|CG5885	6.4			151882_at|CG3270	7.25			154574_at|CG9172	6.3
	154807_at|yps	8.7			143702_at|Gp150	7.16667			151373_at|CG32795	6.4			150167_at|---	7.25			153437_at|yip2	6.3
	153404_at|hop	8.7			142529_s_at|CG7945	7.16667			152267_at|Cyp4d2	6.4			146009_at|CG8498	7.25			147765_at|CG30410	6.3
	151688_s_at|H	8.7			145183_at|CG9921	7.16667			143453_at|Klp64D	6.4			144179_at|Tim8	7.25			143093_at|Cat	6.3
	154279_at|VhaAC39	8.6			147469_at|CG15098	7.16667			152464_at|Gfat2	6.4			151016_at|CG9603	7.25			144430_at|CG3939	6.3
	151931_at|Rab7	8.6			153195_at|CG2846	7.16667			145097_at|CG5548	6.4			152781_at|Pgd	7.1875			152304_at|CG11963	6.3
	154389_at|CG11490	8.6			142239_at|CG10424	7.16667			152875_at|CG7277	6.4			147870_at|CG13585	7.1875			143301_at|Pgk	6.3
	154298_at|RhoBTB	8.6			142158_at|VhaPPA1-1	7.16667			146770_at|CG1550	6.4			148166_at|CG1319	7.1875			152426_at|CG5946	6.3
	151936_at|CG9216	8.6			153436_at|CG32795	7.16667			152355_at|TfIIEalpha	6.4			149722_at|CG18547	7.1875			153436_at|CG32795	6.3
	152677_at|Faf	8.6			155070_at|CG3271	7.16667			152518_at|l(1)G0022	6.4			147221_at|CG12859	7.1875			149949_at|mRpL9	6.3
	142678_at|G-ialpha65A	8.6			152351_at|CG5288	7.16667			150949_at|RpL6	6.4			143314_at|Pros35	7.1875			143658_at|mtacp1	6.3
	151753_r_at|CG33123	8.6			153815_at|Dnz1	7.08333			145215_at|CG9125	6.4			149016_at|CG6852	7.1875			144179_at|Tim8	6.3
	152544_at|CG8683	8.6			153276_at|bip2	7.08333			148527_at|CG32066	6.4			153183_at|l(2)05070	7.125			155023_at|HDAC6	6.3
	153703_at|emc	8.6			154637_at|CG31731	7.08333			147131_at|Spt-I	6.4			145097_at|CG5548	7.125			149633_at|CG14688	6.3
	141512_at|CG33116	8.6			153985_at|CG8552	7.08333			141570_at|CG5706	6.4			153673_at|AnnIX	7.125			142672_at|CG10157	6.3
	141740_at|CG7943	8.6			146639_at|CG10465	7.08333			150590_at|MED28	6.4			153359_at|Jafrac1	7.125			142354_at|CG33056	6.3
	155140_at|REG	8.6			153772_at|Klc	7.08333			144032_at|RpL8	6.4			154431_at|Acer	7.125			146437_at|CG10178	6.3
	154263_at|CG7705	8.6			155076_at|CG5174	7.08333			154658_at|Arp11	6.4			147378_at|CG14482	7.125			143026_at|CG10208	6.3
	154709_at|CG1703	8.6			141309_at|CG7611	7.08333			149399_at|CG1041	6.3			151908_at|CG8128	7.125			147609_at|CG15661	6.3
	155036_at|CG1416	8.6			153141_at|Clc	7.08333			143358_at|Sod	6.3			153962_at|CG3947	7.125			150574_at|---	6.3
	143892_at|RpS3A	8.6			154990_at|CG8121	7.08333			153049_at|DppIII	6.3			149683_at|CG6719	7.0625			153236_at|Fdh	6.2
	153340_at|ran	8.6			154820_at|jagn	7.08333			149768_s_at|Cyp9f2	6.3			142560_at|awd	7.0625			154311_at|CG7461	6.2
	153993_at|CG3403	8.6			152788_at|Aats-thr	7.08333			145594_at|CG17660	6.3			144831_at|CG17333	7.0625			146732_at|CG1707	6.2
	141749_at|l(3)82Fd	8.6			149016_at|CG6852	7.08333			142911_at|Sucb	6.3			149673_at|CG6666	7.0625			143175_at|Gapdh2	6.2
	141644_at|kis	8.6			141770_at|uzip	7.08333			152424_at|Pfk	6.3			142842_at|CG1532	7.0625			145684_at|CG17224	6.2
	154433_at|CG7338	8.6			143940_at|Gap69C	7.08333			146833_at|CG14767	6.3			151819_at|CG3301	7.0625			152843_at|Orct	6.2
	143080_at|Asx	8.6			154555_at|CG10098	7.08333			152354_at|CG7816	6.3			145890_at|CG9498	7.0625			152291_at|CG14290	6.2
	155001_at|CG8321	8.5			153823_at|Pmm45A	7.08333			153695_at|CG6769	6.3			150191_at|CG3734	7.0625			150225_at|Arc42	6.2
	153649_at|CG8029	8.5			153117_at|CG9248	7.08333			153176_at|mRpL10	6.3			144358_at|MED22	7.0625			142194_at|CG9527	6.2
	154091_at|CG11050	8.5			154586_at|CPTI	7.08333			141774_at|Nat1	6.3			151832_at|Oat	7.0625			151888_at|MP1	6.2
	154214_at|Start1	8.5			152890_at|CG10126	7.08333			142269_at|porin	6.3			149607_at|CG12811	7.0625			153176_at|mRpL10	6.2
	155049_at|l(3)05822	8.5			151393_s_at|CG18624	7.08333			154362_at|CG2976	6.3			147608_at|CG4302	7.0625			152431_at|CG17841	6.2
	141647_at|CG12016	8.5			144220_at|CG15261	7.08333			153625_at|Sry-beta	6.3			152187_at|CG3321	7.0625			144701_at|CG12116	6.2
	153983_at|CG4880	8.5			154246_at|dik	7			144653_at|Rab39	6.3			152448_at|CG11236	7.0625			142702_at|CG2263	6.2
	154281_at|p38b	8.5			153607_at|CG32016	7			152240_at|CG9855	6.3			152515_at|Pgi	7.0625			142253_at|CG10560	6.2
	153052_at|CG10420	8.5			143145_at|egl	7			144255_at|CSN6	6.3			142871_s_at|CG9911	7.0625			152267_at|Cyp4d2	6.2
	155153_at|CG4495	8.5			150976_at|CG2177	7			145151_at|mRpL3	6.3			152792_at|CG12375	7.0625			153285_at|RpS5a	6.2
	151715_at|---	8.5			152538_at|Scs-fp	7			144412_at|CG9904	6.3			154994_at|clt	7.0625			150412_at|CG13833	6.2
	147498_at|CalpA	8.5			141706_at|CG1371	7			147176_at|CG16935	6.3			154567_at|CG8132	7.0625			144142_at|---	6.2
	153061_at|CG30421	8.5			143843_at|Rab11	7			152110_at|CG5412	6.3			142716_at|CG9436	7			148725_at|CG8745	6.2
	143740_at|Pk92B	8.5			153052_at|CG10420	7			148986_at|mRpS26	6.3			148055_at|CG16986	7			151508_at|CG33120	6.2
	152028_at|CG3136	8.5			142172_at|CG3530	7			145784_at|mRpS2	6.3			145666_at|CG2862	7			143822_at|alpha-Est8	6.2
	153778_at|Ptpmeg	8.5			152862_at|CG5805	7			151854_at|morgue	6.3			142462_at|CG5532	7			153203_at|CG6178	6.1
	153360_at|cul-4	8.5			154062_at|CG41469	7			146824_at|Vps25	6.3			143033_at|Gal	7			153270_at|CG31063	6.1
	142694_at|CG7177	8.5			153669_at|CG10158	7			149321_at|CG11999	6.3			149312_at|CG2604	7			144664_at|CG1444	6.1
	154241_at|Indy	8.4			152056_at|ref(2)P	7			150482_at|CG13607	6.3			142796_at|CG8306	7			154334_at|CG12079	6.1
	153451_at|Cdk5	8.4			152253_at|CG12582	7			142687_at|CG7766	6.3			141370_at|ppl	7			141412_at|CG6891	6.1
	153310_at|CG3436	8.4			154826_at|Mio	7			146726_at|nec	6.3			143635_at|l(3)03670	7			143729_at|FK506-bp2	6.1
	154170_at|CG5854	8.4			154300_at|CG12034	7			153800_at|SmB	6.3			143649_at|RpS4	7			153769_at|AcCoAS	6.1
	152454_at|Ugt	8.4			152126_at|CG3523	7			155162_at|l(2)03709	6.2			147237_at|Hex-C	7			153359_at|Jafrac1	6.1
	154406_at|CG8229	8.4			151801_at|CG12163	7			152208_at|Fkbp13	6.2			154349_at|CG8814	7			141563_at|Acox57D-p	6.1
	153141_at|Clc	8.4			153880_at|Prosbeta3	7			146698_at|coro	6.2			154086_at|Cap-G	7			142847_at|CG9034	6.1
	141574_at|CG11807	8.4			143358_at|Sod	7			142842_at|CG1532	6.2			145821_at|CG12512	7			143276_at|MtnA	6.1
	154452_at|c11.1	8.4			151826_at|CG6783	7			143313_at|Pros29	6.2			150181_at|Cyp12a4	7			152385_at|Aats-gln	6.1
	154026_at|Snap	8.4			153499_at|exd	6.91667			141563_at|Acox57D-p	6.2			148796_at|CG6878	7			152660_at|CG9672	6.1
	143636_at|dia	8.4			143837_at|Lis-1	6.91667			141231_at|Rpn7	6.2			143899_at|CoVa	6.9375			143908_at|Gs1l	6.1
	153569_at|CG31712	8.4			141446_at|CG5447	6.91667			152227_at|CG6126	6.2			153144_at|Ahcy13	6.9375			144987_at|CG15717	6.1
	141258_at|CG7845	8.4			150990_at|CG17471	6.91667			153188_at|Spase18-21	6.2			154351_at|Pros45	6.9375			147438_at|GstE5	6.1
	154042_at|Dp1	8.4			154289_at|Sgt	6.91667			142892_at|Rtnl1	6.2			154656_at|Aos1	6.9375			152258_at|CG8080	6.1
	141244_at|CG17724	8.4			155030_at|Mtch	6.91667			142875_at|CG6412	6.2			153200_at|---	6.9375			147028_i_at|CG30035	6.1
	154275_at|CG12000	8.3			154468_at|CG7891	6.91667			148634_at|l(3)neo18	6.2			144244_at|Rpt4	6.9375			153087_at|CG8654	6.1
	142415_at|Nmda1	8.3			151693_s_at|CG31301	6.91667			148447_at|Dhpr	6.2			150192_at|CG18493	6.9375			151287_at|Nplp2	6.1
	151794_at|TMS1	8.3			154742_at|Arp66B	6.91667			154229_at|CG10932	6.2			147055_at|CG18343	6.9375			147014_at|lambdaTry	6.1
	142295_at|tsr	8.3			142180_at|CG6359	6.91667			154656_at|Aos1	6.2			141257_at|Gs1	6.9375			148639_at|CG6910	6.1
	150547_at|bai	8.3			154883_at|CG7979	6.91667			150603_at|CG5028	6.2			141217_at|Dak1	6.9375			145304_at|psh	6.1
	155030_at|Mtch	8.3			153088_at|pst	6.91667			145193_at|crl	6.2			142480_at|GstE9	6.9375			150831_at|Obp99a	6.1
	147018_at|san	8.3			152973_at|CG4239	6.91667			148166_at|CG1319	6.2			152569_at|CG11919	6.9375			149624_at|CG3999	6.1
	141810_at|Nc73EF	8.3			144146_at|Eaat1	6.91667			143058_f_at|Act5C	6.2			144595_at|CG3446	6.9375			152732_at|CG5955	6.1
	141551_at|CG3689	8.3			154763_at|Pgm	6.91667			149137_at|CG4825	6.2			154671_at|CG10184	6.875			146558_at|CG14400	6.1
	141782_at|ik2	8.3			146305_at|Vha68-2	6.91667			142407_at|CG4753	6.2			152843_at|Orct	6.875			153713_at|ScpX	6
	141621_at|CG15609	8.3			154791_at|CG14207	6.91667			148837_at|CG17029	6.2			154206_at|CG5315	6.875			147881_at|CG3683	6
	141598_at|CG10641	8.3			152088_at|CG5508	6.91667			143573_at|spi	6.2			149615_at|CG3940	6.875			151812_at|Oscp	6
	153528_at|dco	8.3			148410_at|CG6776	6.91667			149838_at|CG14375	6.2			144581_at|CG3774	6.875			151914_at|CG4390	6
	153455_at|lgs	8.3			152003_at|CG9629	6.91667			147135_at|CG4670	6.2			145908_at|CG11015	6.875			147595_at|CG9350	6
	153738_at|NTPase	8.2			155055_at|CG31549	6.91667			150239_at|CG4845	6.2			153489_at|CG11474	6.875			148634_at|l(3)neo18	6
	153013_at|CG33090	8.2			141658_at|CG5853	6.91667			150762_at|betaTub97EF	6.2			154262_at|GlyP	6.875			152383_at|Argk	6
	153725_at|CG3662	8.2			145030_at|CG11151	6.91667			150385_at|mRpL45	6.2			152568_at|CG2493	6.875			154873_at|CG3209	6
	154887_at|CG5938	8.2			141671_s_at|CG17597	6.91667			148080_at|CG12082	6.2			154487_at|Rab14	6.875			141390_at|l(2)44DEa	6
	152129_at|CG7207	8.2			153596_at|Dip-C	6.91667			142213_at|CSN7	6.2			141472_at|Glt	6.875			141682_at|cathD	6
	151622_at|CG7331	8.2			154804_at|CG8232	6.83333			149751_s_at|MBD-R2	6.2			154544_at|loj	6.875			145327_s_at|CG6891	6
	144170_at|CSN3	8.2			153594_at|CG5284	6.83333			144163_at|CG14777	6.2			154203_at|RpS12	6.875			149673_at|CG6666	6
	142226_at|Sap-r	8.2			152413_at|l(2)k05819	6.83333			152699_at|eIF-4a	6.2			153422_at|Vha44	6.86667			142407_at|CG4753	6
	151754_at|rhea	8.2			146139_at|CG4972	6.83333			143976_at|Pp4-19C	6.2			144147_at|BM-40-SPARC	6.8125			146868_at|CG8788	6
	151567_at|CG1607	8.2			154446_at|Cont	6.83333			147008_at|CG13210	6.2			142669_at|Ost48	6.8125			142457_at|CG10340	6
	152206_at|CG12024	8.2			153155_at|TER94	6.83333			144698_at|CG11190	6.2			152613_at|CG11255	6.8125			154786_at|CG18522	6
	154466_at|myoglianin	8.2			145453_at|CG1518	6.83333			148462_at|CG3911	6.2			144047_at|eIF2B-beta	6.8125			147918_at|mRpL17	6
	155109_at|CG7359	8.2			143715_at|Arf102F	6.83333			149034_at|mRpL21	6.2			152083_at|CG15093	6.8125			152758_at|CG8199	6
	154119_at|CG1344	8.2			152214_at|CG3262	6.83333			152793_at|CG12170	6.2			141307_at|CG4827	6.8125			152020_at|CG31150	6
	142964_at|CG7843	8.2			141732_at|puc	6.83333			145595_at|mRpL48	6.2			141359_at|CG3702	6.8125			143744_at|Rlc1	6
	152018_at|micr	8.2			151936_at|CG9216	6.83333			145416_at|CG17065	6.2			152681_at|CG12384	6.8125			151429_at|CG14933	6
	142614_at|CG32226	8.2			152677_at|Faf	6.83333			150363_at|CG13850	6.2			148950_at|frc	6.8125			150837_at|Obp99b	6
	154599_at|CG2199	8.2			155153_at|CG4495	6.83333			146842_at|MrgBP	6.2			142692_at|Hel25E	6.8125			147139_at|CG10799	6
	151635_s_at|tws	8.2			147018_at|san	6.83333			153131_at|CG2915	6.1			145197_at|CG9742	6.8125			148049_at|Cyp4d20	6
	143853_at|Vang	8.2			141628_at|AP-50	6.83333			149085_at|CG7433	6.1			150547_at|bai	6.8125			149794_at|CG6188	6
	154251_at|capt	8.1			154399_at|UbcD4	6.83333			152003_at|CG9629	6.1			141478_at|Cyp1	6.8125			145728_at|CG16704	6
	152541_at|CG5355	8.1			152358_at|crc	6.83333			146372_at|CG17331	6.1			143830_at|CanB2	6.8125			149938_at|CG3984	6
	152864_at|CG13603	8.1			153376_at|skpA	6.83333			154477_at|ND42	6.1			142226_at|Sap-r	6.8125			143417_at|Yp1	6
	153377_at|CdsA	8.1			142343_at|Fibp	6.83333			143742_at|Rab5	6.1			143979_at|Elongin-C	6.8125			152449_at|CG4389	5.9
	154468_at|CG7891	8.1			142241_at|CG7870	6.83333			144336_at|gammaCop	6.1			152347_at|CG11841	6.8125			141746_at|Prx5037	5.9
	152996_at|---	8.1			150300_at|CG5802	6.83333			154206_at|CG5315	6.1			141776_at|CG12428	6.8125			153159_at|CG5903	5.9
	153387_at|Syx6	8.1			153234_at|CG7668	6.83333			145956_at|CG5958	6.1			154660_at|CG3887	6.8125			147225_at|Cyp6a23	5.9
	142862_at|CG5385	8.1			141251_at|CG9796	6.83333			153200_at|---	6.1			152294_at|CG5577	6.75			153187_at|CG5335	5.9
	146628_at|CG14464	8.1			153366_at|CG10960	6.83333			146732_at|CG1707	6.1			152455_at|CG7470	6.75			149016_at|CG6852	5.9
	151620_at|nuf	8.1			147479_at|CG15111	6.83333			142133_at|ferrochelatase	6.1			151970_at|Vps28	6.75			151908_at|CG8128	5.9
	151697_at|raps	8.1			146372_at|CG17331	6.83333			143631_at|Sec61beta	6.1			143427_at|Tm2	6.75			152187_at|CG3321	5.9
	152543_at|CG2025	8.1			144097_at|Mgstl	6.83333			152962_at|Jafrac2	6.1			147274_at|CG8397	6.75			149312_at|CG2604	5.9
	141493_at|fog	8.1			152581_at|Spn5	6.83333			142834_at|Irp-1A	6.1			142399_at|CG9027	6.75			154671_at|CG10184	5.9
	141326_at|Akap200	8.1			144586_at|CG3566	6.83333			145955_at|CG5261	6.1			153279_at|Tapdelta	6.75			154078_at|Cyp4e2	5.9
	153421_at|fdl	8.1			152393_at|CG9512	6.83333			146114_at|CG4658	6.1			154495_at|CG6459	6.75			153785_at|CG7997	5.9
	153920_at|Btk29A	8.1			153504_at|CG33138	6.83333			152799_at|CG4585	6.1			149681_at|CG17734	6.75			141465_at|CG10026	5.9
	141422_at|Csk	8.1			155087_at|vlc	6.75			143374_at|T-cp1	6.1			153040_at|CG17765	6.75			145970_at|TepII	5.9
	146627_at|CG17528	8.1			154482_at|CG9636	6.75			153358_at|Nmd3	6.1			154586_at|CPTI	6.75			149063_at|CG9372	5.9
	152720_at|CG31367	8.1			154591_at|put	6.75			141387_at|mge	6.1			144160_i_at|ox	6.75			146767_at|CG12825	5.9
	153166_at|CG4511	8.1			153145_at|Tpr2	6.75			152234_at|betaCop	6.1			145531_at|CG4164	6.75			151389_at|CG32736	5.9
	153824_at|ck	8.1			143311_at|PpV	6.75			150080_at|CG5840	6.1			141625_at|Syb	6.75			144806_at|CG32687	5.9
	153319_at|CG3249	8.1			155005_at|CG18292	6.75			148003_at|mRpL46	6.1			145415_at|CG9577	6.6875			152748_at|CG1468	5.9
	155098_at|CG3605	8.1			153868_at|CG2813	6.75			141479_at|Atg9	6.1			152185_at|CG11876	6.6875			143062_at|ade3	5.9
	143884_at|smid	8.1			155025_at|ergic53	6.75			148414_at|CG6638	6.1			148646_at|VhaSFD	6.6875			153122_at|ade2	5.9
	153456_at|CG12084	8.1			152996_at|---	6.75			146745_at|CG1620	6.1			141232_at|CG5044	6.6875			149474_at|CG7900	5.9
	155002_at|Nup358	8.1			154876_at|CG14646	6.75			145265_at|CG6762	6.1			142548_at|CG9000	6.6875			149518_at|CG8112	5.9
	153293_at|CG11107	8.1			153381_at|CG5973	6.75			144879_at|CG1749	6.1			152556_at|Ser7	6.6875			145730_at|CG16713	5.9
	154084_s_at|Patj	8.1			141567_at|CG5869	6.75			144948_at|CG1824	6.1			152291_at|CG14290	6.6875			146413_at|CG6870	5.9
	141383_at|fwd	8.1			155037_at|Pka-R1	6.75			154584_at|CG11063	6.1			146053_at|Tsp29Fb	6.6875			143418_at|Yp3	5.9
	154621_at|CG17273	8			143979_at|Elongin-C	6.75			146741_at|kappaB-Ras	6.1			154078_at|Cyp4e2	6.6875			151208_at|CG15068	5.9
	145385_at|Sec61gamma	8			153320_at|Smg6	6.75			144996_at|CG15743	6.1			154672_at|torp4a	6.6875			154075_at|Acox57D-d	5.88889
	154999_at|grp	8			143011_at|CG4822	6.75			154852_at|CG10639	6			153785_at|CG7997	6.6875			144335_at|26-29-p	5.8
	152000_at|CHOp24	8			153026_at|CG8057	6.75			154873_at|CG3209	6			142453_at|GNBP3	6.6875			155145_at|l(1)G0255	5.8
	152346_s_at|CG7927	8			154242_at|l(1)G0193	6.75			152350_at|CG1927	6			154280_at|CG3776	6.6875			153656_at|CG30499	5.8
	154990_at|CG8121	8			155145_at|l(1)G0255	6.75			141356_at|CG7430	6			153303_at|Pros25	6.6875			153110_at|Int6	5.8
	151693_s_at|CG31301	8			142746_at|Men	6.75			145716_at|CG17593	6			141666_at|CG11844	6.6875			153158_at|cl	5.8
	148854_at|MED10	8			146084_at|Aldh	6.75			152351_at|CG5288	6			144161_r_at|ox	6.6875			151853_at|CG8790	5.8
	145507_at|galectin	8			145327_s_at|CG6891	6.75			144097_at|Mgstl	6			146708_at|Tsp42Ed	6.6875			153450_at|Nipsnap	5.8
	152619_at|CG30296	8			152933_at|CG7529	6.75			148646_at|VhaSFD	6			153314_at|eIF-3p66	6.625			148410_at|CG6776	5.8
	152021_at|Hrb87F	8			153137_at|eIF5	6.66667			142243_at|CG9306	6			144350_at|CG5254	6.625			142510_at|EfTuM	5.8
	144109_at|Rlip	8			154521_at|Fur2	6.66667			148055_at|CG16986	6			153246_at|CG12107	6.625			143547_at|Crc	5.8
	153014_at|CG32278	8			154479_at|CG8507	6.66667			154320_at|Jra	6			154510_at|epsilonCOP	6.625			150421_at|CG6726	5.8
	153954_at|Tsp96F	8			143861_at|didum	6.66667			142653_at|CG8315	6			151390_at|CG32736	6.625			152088_at|CG5508	5.8
	153636_at|DDB1	8			148635_at|CG5642	6.66667			148540_at|Aps	6			148422_at|CG5804	6.625			148638_at|CAH2	5.8
	142876_at|Trl	8			151711_at|bc10	6.66667			142734_at|CG7049	6			145140_at|CG9240	6.625			141685_at|Sp7	5.8
	143566_i_at|Pabp2	8			146134_at|CG4946	6.66667			142795_at|CG8311	6			151841_at|CG8586	6.625			144971_at|mRpL49	5.8
	152150_at|CG8108	8			142678_at|G-ialpha65A	6.66667			141568_at|regucalcin	6			142414_at|CG11315	6.625			147564_at|CG16799	5.8
	153444_at|JIL-1	8			141574_at|CG11807	6.66667			154580_at|mRpL1	6			142746_at|Men	6.625			155074_at|CG7530	5.8
	141612_at|Su(z)12	8			154452_at|c11.1	6.66667			142139_at|CG3699	6			153615_at|CG1637	6.625			152370_at|CG3624	5.8
	143820_at|alpha-Adaptin	8			153387_at|Syx6	6.66667			145801_at|CG3792	6			152440_at|l(2)37Cc	6.625			152371_at|Irk2	5.8
	153713_at|ScpX	7.9			154920_at|CG2162	6.66667			147201_at|CG17385	6			154652_at|alpha-Est1	6.625			144846_at|Vago	5.8
	153962_at|CG3947	7.9			150126_at|eIF-1A	6.66667			141747_at|CG9053	6			152047_at|CG7601	6.625			152851_at|CG31743	5.8
	144183_at|EDTP	7.9			153757_at|CG5515	6.66667			154900_at|CG7656	6			145650_at|CG3214	6.625			142206_s_at|CG14526	5.8
	146004_at|CG7380	7.9			151929_at|CG30392	6.66667			153017_at|CG5989	6			143422_at|Pros28.1	6.5625			145026_at|CG11158	5.8
	152991_at|slim	7.9			153115_at|CG5214	6.66667			142690_at|CG9977	6			153435_at|blw	6.5625			154048_at|CG5991	5.8
	152009_at|mRpS30	7.9			141697_at|Gel	6.66667			149196_at|CG32444	6			143788_at|Pcmt	6.5625			146233_at|hgo	5.8
	153165_at|Cip4	7.9			153900_at|CG9526	6.66667			143865_at|mod(r)	6			151370_at|CG17776	6.5625			141276_at|Sodh-2	5.8
	149576_at|Pnn	7.9			154175_at|CG3534	6.66667			148291_at|CG10075	6			149914_at|smp-30	6.5625			143958_at|Tsf1	5.8
	152460_at|CG5807	7.9			154477_at|ND42	6.66667			143389_f_at|alphaTub85E	6			141563_at|Acox57D-p	6.5625			152734_at|Cyp28a5	5.8
	153750_at|CG7289	7.9			142871_s_at|CG9911	6.66667			143933_at|Rack1	6			148837_at|CG17029	6.5625			152929_at|CG4288	5.8
	152898_at|tmod	7.9			154672_at|torp4a	6.66667			147766_at|CG3500	6			147373_at|eIF3-S9	6.5625			151895_at|Rh50	5.8
	154145_at|arm	7.9			141298_at|CG9186	6.66667			153545_at|eIF2B-delta	6			145692_at|CG12400	6.5625			142367_at|CG9649	5.8
	154057_at|Nup154	7.9			143729_at|FK506-bp2	6.66667			142691_at|CG12093	6			151263_at|CG7630	6.5625			153309_at|CG6020	5.7
	145565_at|CG4887	7.9			152616_at|CG9008	6.66667			142710_at|Bzd	6			150179_at|mRpL55	6.5625			144766_at|CG1354	5.7
	153565_at|l(2)gl	7.9			143742_at|Rab5	6.66667			152557_at|CG8043	6			150816_at|CG1458	6.5625			150191_at|CG3734	5.7
	141291_at|Hcf	7.9			153323_at|CG17896	6.66667			147601_at|CG9394	6			148689_at|CG11267	6.5625			153279_at|Tapdelta	5.7
	143893_at|Ric	7.9			152090_at|CG6746	6.66667			152082_at|CG5196	6			152519_at|CG8776	6.5625			146708_at|Tsp42Ed	5.7
	153467_at|Cp190	7.9			141278_at|gw	6.58333			142203_at|l(1)G0431	6			147379_at|CG14483	6.5625			151360_at|CG33254	5.7
	151698_at|CG1812	7.9			153311_at|Hsc70-5	6.58333			146680_at|Dpit47	6			148484_at|CG6767	6.5625			143550_at|RpL7	5.7
	142920_at|Aef1	7.9			155078_at|Rab8	6.58333			142196_at|Jheh1	5.9			152886_at|CG15658	6.5625			151458_at|CG31676	5.7
	146652_at|CG17337	7.8			151861_at|CG8230	6.58333			154763_at|Pgm	5.9			151667_s_at|CG6673	6.5625			142488_s_at|CG14715	5.7
	153849_at|l(2)k09913	7.8			151753_r_at|CG33123	6.58333			141298_at|CG9186	5.9			145511_at|CG3164	6.5625			152425_at|Fmo-2	5.7
	145716_at|CG17593	7.8			152544_at|CG8683	6.58333			155056_at|Prosbeta2	5.9			155081_at|JhI-26	6.5625			147679_at|CG4752	5.7
	154685_at|Tom20	7.8			142226_at|Sap-r	6.58333			145666_at|CG2862	5.9			142407_at|CG4753	6.5			150881_at|RpS7	5.7
	147105_at|CG8594	7.8			153396_at|CRMP	6.58333			144244_at|Rpt4	5.9			144364_at|CG14630	6.5			142142_at|CG4721	5.7
	154741_at|CycC	7.8			142590_at|CG9066	6.58333			152383_at|Argk	5.9			154406_at|CG8229	6.5			146022_at|CG14275	5.7
	141628_at|AP-50	7.8			154572_at|AP-47	6.58333			149487_at|eIF4AIII	5.9			144246_at|Rpn12	6.5			143151_at|Est-6	5.7
	154399_at|UbcD4	7.8			142314_at|CG7188	6.58333			141501_at|CG30382	5.9			154644_at|ProsMA5	6.5			148835_at|CG10516	5.7
	152941_at|Ice	7.8			143774_at|betaggt-I	6.58333			153673_at|AnnIX	5.9			154814_at|Ald	6.5			154772_at|sug	5.7
	153041_at|Vha55	7.8			152684_at|CG4851	6.58333			154396_at|Aats-phe	5.9			148608_at|RpL10Ab	6.5			141799_at|CG8051	5.7
	153747_at|drk	7.8			153786_at|CG9628	6.58333			152024_at|CG3033	5.9			152512_at|Treh	6.5			147144_at|CG4734	5.7
	153997_at|Vha100-1	7.8			151849_at|Uch	6.58333			142505_at|eIF-3p40	5.9			142736_s_at|Hmgs	6.5			146585_at|CG8665	5.7
	142514_at|TfIIFbeta	7.8			153711_at|CG9320	6.58333			152735_at|Ufd1-like	5.9			150225_at|Arc42	6.4375			141497_at|CG7144	5.7
	153870_at|tub	7.8			151888_at|MP1	6.58333			150192_at|CG18493	5.9			154508_at|Sec61alpha	6.4375			141353_at|CG6687	5.7
	153478_at|Stam	7.8			141637_at|CG5721	6.58333			141504_at|Khc	5.9			141550_at|CG2970	6.4375			144851_at|CG15199	5.7
	154248_at|CG6650	7.8			141204_at|CG6453	6.58333			153354_at|CG5325	5.9			142911_at|Sucb	6.4375			152701_at|CG10824	5.7
	141580_at|Bap	7.8			154208_at|CG16721	6.58333			142686_at|Bx42	5.9			153880_at|Prosbeta3	6.4375			143625_at|Vha14	5.6
	154725_at|Src42A	7.8			149681_at|CG17734	6.58333			155054_at|CG18143	5.9			152115_at|CG1309	6.4375			144219_at|l(2)35Di	5.6
	153180_at|CG6169	7.8			149316_at|CG12173	6.58333			155023_at|HDAC6	5.9			153010_at|Chmp1	6.4375			152334_at|Tpi	5.6
	142165_at|CG3625	7.7			153785_at|CG7997	6.58333			145712_at|CG2774	5.9			141450_at|Sodh-1	6.4375			142243_at|CG9306	5.6
	154968_at|CG5168	7.7			153236_at|Fdh	6.58333			141778_at|CG5902	5.9			151876_at|Reg-2	6.4375			153790_at|l(1)G0334	5.6
	155126_at|CG17667	7.7			144335_at|26-29-p	6.58333			154342_at|CG12304	5.9			151495_at|CG2930	6.4375			148295_at|CG9953	5.6
	143535_at|Hnf4	7.7			152534_at|CG9331	6.58333			153344_at|CG10664	5.9			142724_at|CG11137	6.4375			145269_at|CG32495	5.6
	152035_at|CG10373	7.7			153658_at|CG14998	6.5			152331_at|CG5045	5.9			142847_at|CG9034	6.4375			141480_at|CG2107	5.6
	142659_at|l(2)k14710	7.7			141205_at|CG18177	6.5			142457_at|CG10340	5.9			152663_at|CG8707	6.4375			142785_at|mRpS9	5.6
	142172_at|CG3530	7.7			142283_at|Nrx-IV	6.5			151390_at|CG32736	5.9			150421_at|CG6726	6.4375			152066_at|Aats-asn	5.6
	152358_at|crc	7.7			152863_at|CG7565	6.5			148422_at|CG5804	5.9			145818_s_at|cype	6.4375			143899_at|CoVa	5.6
	149719_at|CG18347	7.7			148548_at|l(3)01239	6.5			149694_at|wkd	5.9			154636_at|CG8004	6.4375			154203_at|RpS12	5.6
	142569_at|slgA	7.7			151657_at|CG18604	6.5			141702_at|Nup44A	5.9			142537_at|GstE6	6.4375			151390_at|CG32736	5.6
	143657_at|OstStt3	7.7			152946_at|Uba1	6.5			143849_at|Slh	5.9			143896_at|ND75	6.375			152886_at|CG15658	5.6
	143528_at|plx	7.7			146004_at|CG7380	6.5			143074_at|RpLP0	5.9			152884_at|CG4663	6.375			149813_at|CG17327	5.6
	151021_at|CG11985	7.7			152991_at|slim	6.5			153685_at|CG9205	5.9			152051_at|eIF-2alpha	6.375			153541_at|CG5885	5.6
	153282_at|CG6983	7.7			152941_at|Ice	6.5			155147_at|CG1307	5.9			154332_at|CG12876	6.375			142776_at|CG17680	5.6
	152417_at|Tbp-1	7.7			149719_at|CG18347	6.5			142843_at|SP2637	5.9			148447_at|Dhpr	6.375			152368_at|Irc	5.6
	153112_at|CG3065	7.7			153092_at|Chd64	6.5			152746_at|CG5862	5.9			148291_at|CG10075	6.375			151839_at|vir-1	5.6
	145005_at|Tim9a	7.7			152382_at|CG7149	6.5			149144_at|CG4042	5.9			144369_at|CG11378	6.375			144163_at|CG14777	5.6
	154322_at|CG7185	7.7			152173_at|RNaseX25	6.5			141269_at|CG8399	5.9			142413_at|CG11314	6.375			154175_at|CG3534	5.6
	146460_at|Nedd8	7.7			142548_at|CG9000	6.5			142167_at|CG17259	5.9			152088_at|CG5508	6.375			152154_at|CG7227	5.6
	147233_at|CG8090	7.7			154304_at|CG3618	6.5			143142_at|Ef1alpha100E	5.9			151972_at|CG8206	6.375			150337_at|CG6560	5.6
	152430_at|l(2)01424	7.7			152753_at|sec10	6.5			145756_at|CG3652	5.9			152744_at|CG4692	6.375			141315_at|CG16926	5.6
	143957_at|CG11971	7.7			150308_at|AP-2sigma	6.5			147254_at|GalNAc-T1	5.9			146772_at|CG12822	6.375			153148_at|CG5114	5.6
	155118_at|swm	7.7			147373_at|eIF3-S9	6.5			153020_at|Atg2	5.9			142715_at|CG3420	6.375			154956_at|CG4408	5.6
	153409_at|B52	7.7			152231_at|CG5594	6.5			144149_at|Ady43A	5.9			149653_at|SelR	6.375			142220_at|CG8193	5.6
	153794_at|CG6364	7.7			144140_at|Mpcp	6.5			150059_at|CG5292	5.9			143115_at|Cyt-c-p	6.375			142956_at|alpha-Est3	5.6
	151623_at|CG12424	7.7			147055_at|CG18343	6.5			144887_at|CG11695	5.9			141443_at|Oscillin	6.375			146481_at|CG10685	5.6
	152011_at|repo	7.7			146620_s_at|CG7546	6.5			141232_at|CG5044	5.8			153443_at|CG6022	6.375			150712_at|CG6074	5.6
	155156_at|CG9246	7.7			153104_at|CG3040	6.5			152416_at|Ent2	5.8			147479_at|CG15111	6.375			145974_at|CG13794	5.6
	153735_at|yrt	7.7			142434_at|Tina-1	6.5			143940_at|Gap69C	5.8			146503_at|TepIV	6.375			155112_at|DyakCG7217	5.5
	154081_at|mod	7.66667			154770_at|CG8289	6.41667			153504_at|CG33138	5.8			150834_at|Obp99c	6.375			153792_at|granny-smith	5.5
	141619_at|Fatp	7.6			154226_at|ctp	6.41667			141637_at|CG5721	5.8			153033_at|CG7675	6.375			153932_at|CG5177	5.5
	154150_at|Got1	7.6			154924_at|Nipped-A	6.41667			142571_at|l(2)s5379	5.8			144122_at|UbcD10	6.375			153956_at|Ard1	5.5
	151930_at|Vha26	7.6			154748_at|cdm	6.41667			150488_at|CG5510	5.8			151301_at|CG13315	6.375			152781_at|Pgd	5.5
	141226_at|CG6904	7.6			151878_at|CG7364	6.41667			154393_at|CG4364	5.8			148040_at|CG8993	6.375			141307_at|CG4827	5.5
	153684_at|cact	7.6			151472_at|CG5053	6.41667			146748_at|CG1598	5.8			142395_at|CG31839	6.375			145692_at|CG12400	5.5
	149467_at|CG2791	7.6			153916_at|CG17486	6.41667			145140_at|CG9240	5.8			152900_at|Cyp6g1	6.375			148689_at|CG11267	5.5
	154820_at|jagn	7.6			153942_at|CG8924	6.41667			149722_at|CG18547	5.8			152009_at|mRpS30	6.375			155081_at|JhI-26	5.5
	153376_at|skpA	7.6			153659_at|Adf1	6.41667			153538_at|CG8839	5.8			153449_at|eEF1delta	6.375			153010_at|Chmp1	5.5
	153396_at|CRMP	7.6			153972_at|CG32164	6.41667			154259_at|Spn27A	5.8			151378_at|mRpL33	6.375			148291_at|CG10075	5.5
	153092_at|Chd64	7.6			148854_at|MED10	6.41667			144712_at|Hexo2	5.8			154096_at|CG6903	6.3125			141443_at|Oscillin	5.5
	153913_at|Ubc-E2H	7.6			152009_at|mRpS30	6.41667			152624_at|CG9467	5.8			145395_at|CG12703	6.3125			155054_at|CG18143	5.5
	151979_at|CG6455	7.6			153165_at|Cip4	6.41667			151819_at|CG3301	5.8			144883_at|CG11699	6.3125			141387_at|mge	5.5
	144181_at|Cdk5alpha	7.6			151637_at|---	6.41667			144364_at|CG14630	5.8			148160_at|CG1265	6.3125			149672_at|nocturnin	5.5
	152242_at|atl	7.6			152508_at|CG13784	6.41667			144369_at|CG11378	5.8			155054_at|CG18143	6.3125			149019_at|RpL26	5.5
	149084_at|CG7646	7.6			153290_at|Nmt	6.41667			142711_at|CG8636	5.8			154342_at|CG12304	6.3125			146946_s_at|CG12896	5.5
	142198_at|Pop2	7.6			143733_at|His4r	6.41667			142179_s_at|CG18616	5.8			145202_at|CG9673	6.3125			145265_at|CG6762	5.5
	144024_at|PRL-1	7.6			153500_at|CG11984	6.41667			151841_at|CG8586	5.8			151808_at|l(3)02640	6.3125			147436_at|GstE3	5.5
	153897_at|BicD	7.6			152791_at|Hs2st	6.41667			142531_at|eIF-2beta	5.8			153903_at|Rpn9	6.3125			153017_at|CG5989	5.5
	142758_at|Mkk4	7.6			151998_at|CG10194	6.41667			152600_at|---	5.8			151932_at|Cyt-b5-r	6.3125			142472_at|RpL3	5.5
	154678_at|smo	7.6			153935_at|CG6370	6.41667			150602_at|CG4743	5.8			154747_at|Jheh3	6.3125			152050_at|CG10512	5.5
	151756_at|Cap-H2	7.6			152629_at|CG5455	6.41667			150041_at|CG3590	5.8			149813_at|CG17327	6.3125			152126_at|CG3523	5.5
	153633_at|slmb	7.6			151806_at|Oatp74D	6.41667			144196_at|Nup170	5.8			143022_at|CG4225	6.3125			144306_at|CG7532	5.5
	142830_at|klar	7.6			144699_at|CG1440	6.41667			153302_at|CG7842	5.8			149568_at|CG9396	6.3125			144700_at|CG15347	5.5
	145163_at|CG8928	7.6			144160_i_at|ox	6.41667			142597_at|CG5734	5.8			142285_at|mRpL13	6.3125			155139_at|CG18135	5.5
	151721_at|MYPT-75D	7.6			143912_at|ATPCL	6.41667			147985_at|CG7852	5.8			152230_at|Aats-gly	6.3125			151958_at|Spn1	5.5
	153707_at|mrj	7.6			152407_at|CG11198	6.41667			153138_at|RpL17	5.8			144829_at|CG15209	6.3125			153899_at|RpL11	5.5
	151520_i_at|spir	7.6			149674_at|Tctp	6.41667			147931_at|Cypl	5.8			152711_at|CG3663	6.3125			142190_at|Cyp6a21	5.5
	153617_at|CG8578	7.6			141423_at|Nc	6.41667			144218_at|CG6424	5.8			146486_at|CG13086	6.3125			149937_at|CG6912	5.5
	141535_at|Rtc1	7.6			147691_at|CG2852	6.41667			147178_at|CG13349	5.8			144520_at|CG16756	6.3125			146808_at|CG8693	5.5
	153995_at|Tao-1	7.6			146746_at|Cyt-b5	6.41667			146316_at|CG9426	5.8			154242_at|l(1)G0193	6.3125			150340_at|mRpL35	5.5
	154565_at|CG12007	7.5			154567_at|CG8132	6.41667			147061_at|CG13176	5.8			141531_at|CG5541	6.3125			152740_at|CG7995	5.5
	153450_at|Nipsnap	7.5			146339_at|CG9267	6.41667			149773_at|Scgbeta	5.8			145800_at|mRpL28	6.3125			148446_at|Tequila	5.5
	150040_at|CG17556	7.5			142480_at|GstE9	6.41667			144534_at|Sirt4	5.8			152602_at|CG4196	6.3125			150732_at|Cyp6a18	5.5
	141355_at|CG8031	7.5			151795_at|Idh	6.41667			153880_at|Prosbeta3	5.7			154269_at|Acon	6.3125			145346_at|Obp18a	5.5
	143702_at|Gp150	7.5			154514_at|Cortactin	6.33333			152534_at|CG9331	5.7			141453_at|CG3501	6.3125			146184_at|CG17108	5.5
	152788_at|Aats-thr	7.5			143670_at|Mad	6.33333			147373_at|eIF3-S9	5.7			143945_at|Scp2	6.3125			145058_at|CG1461	5.5
	152862_at|CG5805	7.5			151700_at|Tm1	6.33333			153576_at|CG6084	5.7			141476_at|CG18324	6.3125			154001_at|CG5560	5.5
	154742_at|Arp66B	7.5			143928_at|Elf	6.33333			154223_at|Trip1	5.7			142241_at|CG7870	6.3125			142386_at|CG6484	5.5
	142343_at|Fibp	7.5			151686_s_at|CaMKII	6.33333			141412_at|CG6891	5.7			143276_at|MtnA	6.3125			147152_at|Ser8	5.5
	154920_at|CG2162	7.5			143162_at|flw	6.33333			148273_at|CG13298	5.7			153141_at|Clc	6.3125			151807_at|CG5590	5.4
	151637_at|---	7.5			151692_i_at|CG31301	6.33333			142390_at|CG3246	5.7			153347_at|Gpdh	6.3125			142133_at|ferrochelatase	5.4
	143390_at|betaTub56D	7.5			141486_at|Csp	6.33333			142232_at|nmd	5.7			141226_at|CG6904	6.3125			154901_at|mtTFB1	5.4
	153292_at|CG7861	7.5			143808_at|mbc	6.33333			154529_at|CG10576	5.7			153186_at|Ugt86Da	6.3125			146973_at|CG7712	5.4
	153825_at|Pur-alpha	7.5			151715_at|---	6.33333			153777_at|pyd3	5.7			153026_at|CG8057	6.3125			153283_at|ATPsyn-b	5.4
	145276_at|CG7192	7.5			142862_at|CG5385	6.33333			141712_at|CDase	5.7			151930_at|Vha26	6.3125			151641_at|CG31673	5.4
	141729_at|CG9302	7.5			142569_at|slgA	6.33333			146764_at|CG18812	5.7			152452_at|Idgf2	6.3125			144105_at|CG3621	5.4
	153718_at|ttv	7.5			153913_at|Ubc-E2H	6.33333			154244_at|Gapdh1	5.7			141619_at|Fatp	6.3125			146619_i_at|Mgstl	5.4
	153921_at|key	7.5			143262_at|mago	6.33333			142462_at|CG5532	5.7			153407_at|Ide	6.3125			147870_at|CG13585	5.4
	155134_at|MICAL-like	7.5			153402_at|CG1847	6.33333			153110_at|Int6	5.7			153041_at|Vha55	6.3125			150192_at|CG18493	5.4
	153883_at|Nlp	7.5			153949_at|CG2608	6.33333			152873_at|CG8596	5.7			143766_i_at|His3.3A	6.25			145202_at|CG9673	5.4
	155152_at|CG12299	7.5			154653_at|Lac	6.33333			142173_s_at|---	5.7			149345_at|CG12171	6.25			142285_at|mRpL13	5.4
	153383_at|CG17735	7.5			153355_at|CG2118	6.33333			141292_at|CG1236	5.7			151769_at|CG3731	6.25			152711_at|CG3663	5.4
	153459_at|Thd1	7.5			141271_at|CG1021	6.33333			141582_at|Rop	5.7			146489_at|Pax	6.25			149674_at|Tctp	5.4
	153073_at|CG17034	7.5			149586_at|RpS29	6.33333			148965_at|CG6259	5.7			152424_at|Pfk	6.25			144984_at|CG2200	5.4
	150993_at|CG11076	7.5			154457_at|CG8386	6.33333			153392_at|CG18854	5.7			142875_at|CG6412	6.25			152402_at|Nacalpha	5.4
	150999_at|CG11148	7.5			146882_at|ced-6	6.33333			152083_at|CG15093	5.7			150603_at|CG5028	6.25			142951_at|CG7916	5.4
	153390_at|pUf68	7.5			153262_at|CG5969	6.33333			153694_at|Baldspot	5.7			144336_at|gammaCop	6.25			144868_at|CG11752	5.4
	155119_at|lig	7.5			153927_at|CG8460	6.33333			152577_at|slmo	5.7			141387_at|mge	6.25			154393_at|CG4364	5.4
	154130_at|ric8a	7.5			141806_at|CG32158	6.33333			143005_at|CG4199	5.7			153711_at|CG9320	6.25			141255_at|FKBP59	5.4
	151874_at|Ulp1	7.5			151853_at|CG8790	6.33333			153099_at|Aut1	5.7			149672_at|nocturnin	6.25			152616_at|CG9008	5.4
	153133_at|Drp1	7.44444			152070_at|CG10992	6.33333			142788_at|CG14222	5.7			149188_at|CG7181	6.25			152759_at|CG17549	5.4
	154858_at|sar1	7.4			141342_at|CG6145	6.33333			142358_at|deltaCOP	5.7			153046_at|Spat	6.25			150944_at|CG11334	5.4
	141691_at|spz	7.4			154321_at|Fer1HCH	6.33333			153193_at|CG8145	5.7			143739_at|Pdi	6.25			149645_at|CG14687	5.4
	153894_at|CG11897	7.4			153187_at|CG5335	6.33333			143642_at|RpL13	5.7			154260_at|CG4882	6.25			153139_at|CG7950	5.4
	154636_at|CG8004	7.4			153184_at|CG32803	6.33333			154769_at|CG17565	5.7			146868_at|CG8788	6.25			153106_at|CG15629	5.4
	151982_at|CG8481	7.4			153576_at|CG6084	6.33333			142301_s_at|Mob1	5.7			151802_at|Adh	6.25			152159_at|CG1774	5.4
	149016_at|CG6852	7.4			150121_at|CG7998	6.33333			145890_at|CG9498	5.7			154343_at|CG9509	6.25			143582_at|RpL23	5.4
	154062_at|CG41469	7.4			151897_at|Gclm	6.33333			143966_at|Cbp20	5.7			154304_at|CG3618	6.25			152265_at|CG11892	5.4
	152382_at|CG7149	7.4			141484_at|CG10672	6.33333			142413_at|CG11314	5.7			153772_at|Klc	6.25			142628_at|CG4594	5.4
	152508_at|CG13784	7.4			141703_at|CG9510	6.33333			142122_at|7B2	5.7			143461_at|RpS14b	6.25			151496_s_at|CG14526	5.4
	153290_at|Nmt	7.4			141815_at|PHGPx	6.33333			154405_at|TRAM	5.7			147336_at|CG6426	6.25			149583_at|CG9471	5.4
	151663_at|CG32649	7.4			153364_at|CG9232	6.33333			153970_at|CG7860	5.7			153365_at|CG15825	6.25			152827_at|PGRP-LB	5.4
	154296_at|Aly	7.4			153976_at|Pak	6.25			142935_at|CG4643	5.7			143184_at|GstD1	6.25			149329_at|CG2663	5.4
	152053_at|CG13124	7.4			154095_at|CG3107	6.25			147109_at|CG8778	5.7			141738_at|CG9706	6.25			146014_at|CG8353	5.4
	152472_at|cenB1A	7.4			153232_at|CG33298	6.25			147630_at|CG10320	5.7			153318_at|bgm	6.25			151735_at|Egfr	5.4
	152301_at|CG12918	7.4			151683_at|CG14648	6.25			148501_at|CG6707	5.7			149871_at|CG3153	6.25			146425_at|CG15152	5.4
	153551_at|CG15087	7.4			151935_at|Tl	6.25			142881_at|pll	5.7			154321_at|Fer1HCH	6.25			147587_at|CG15649	5.4
	143092_at|CkIIbeta	7.4			151515_at|PpD3	6.25			154435_at|CG7168	5.7			152035_at|CG10373	6.25			152683_at|CG17664	5.4
	145157_at|Aats-arg	7.4			141283_at|cup	6.25			144902_at|CG15739	5.7			142194_at|CG9527	6.2			143606_at|Cyp18a1	5.4
	152192_at|Cnx99A	7.4			145522_at|CG11555	6.25			155057_at|CG10107	5.7			143473_at|Su(P)	6.1875			147700_at|CG30269	5.4
	142291_at|PpD3	7.4			153703_at|emc	6.25			145489_at|CG17598	5.7			149779_at|CG18549	6.1875			146717_at|Tsp42Eq	5.4
	141584_at|Crag	7.4			145507_at|galectin	6.25			154806_at|atms	5.7			153541_at|CG5885	6.1875			145698_at|CG15406	5.4
	144017_at|Hop	7.4			152619_at|CG30296	6.25			153849_at|l(2)k09913	5.6			152024_at|CG3033	6.1875			144428_at|CG3603	5.4
	147511_at|hrg	7.4			151979_at|CG6455	6.25			152120_at|Cyp6d5	5.6			145071_at|mRpS25	6.1875			151538_s_at|RfaBp	5.4
	154472_at|CG4266	7.4			151663_at|CG32649	6.25			153656_at|CG30499	5.6			151923_at|SelG	6.1875			154477_at|ND42	5.3
	153647_at|bif	7.4			149420_at|CG1943	6.25			145368_at|CG12203	5.6			149674_at|Tctp	6.1875			152675_at|CG1681	5.3
	148173_at|CG15019	7.4			153624_at|MESR3	6.25			150013_at|mRpS33	5.6			151360_at|CG33254	6.1875			142627_at|CG4598	5.3
	153128_at|CG4802	7.3			151761_at|MTF-1	6.25			145637_at|CG3609	5.6			149019_at|RpL26	6.1875			147789_at|CG17280	5.3
	142529_s_at|CG7945	7.3			148907_at|zetaCOP	6.25			142705_at|Pros26	5.6			154272_at|fbl	6.1875			154053_at|Trxr-1	5.3
	152173_at|RNaseX25	7.3			154105_at|CG8233	6.25			146973_at|CG7712	5.6			154085_at|Eip55E	6.1875			147006_at|CG13220	5.3
	143262_at|mago	7.3			152425_at|Fmo-2	6.25			142885_at|CG10166	5.6			151814_at|CG8549	6.1875			144156_at|Vha13	5.3
	153402_at|CG1847	7.3			154257_at|CG5978	6.25			150191_at|CG3734	5.6			151937_at|CG1213	6.1875			142715_at|CG3420	5.3
	151460_i_at|---	7.3			154895_at|CG6523	6.25			142964_at|CG7843	5.6			146379_at|Ugt36Bc	6.1875			143461_at|RpS14b	5.3
	153879_at|RanGap	7.3			141541_at|CG13868	6.25			142303_at|Mdh	5.6			155055_at|CG31549	6.1875			143184_at|GstD1	5.3
	141704_at|MRP	7.3			153845_at|CG6321	6.25			153359_at|Jafrac1	5.6			152866_at|Cyp28d1	6.1875			147835_at|RpL12	5.3
	153699_at|SsRbeta	7.3			154086_at|Cap-G	6.25			147789_at|CG17280	5.6			141406_at|CG8129	6.1875			141547_at|Zw	5.3
	153065_at|lqf	7.3			154223_at|Trip1	6.25			154984_at|CG4036	5.6			141434_at|CG13887	6.1875			146699_at|Spn4	5.3
	153484_at|CG5445	7.3			154901_at|mtTFB1	6.25			142878_at|CG6461	5.6			154685_at|Tom20	6.1875			142531_at|eIF-2beta	5.3
	153430_at|cbx	7.3			141214_at|Gdi	6.25			153030_at|CG9674	5.6			141674_at|PyK	6.125			143397_at|RpL40	5.3
	153955_at|CG14782	7.3			144079_at|Roc1a	6.25			143033_at|Gal	5.6			148168_at|CG32250	6.125			151950_at|Sptr	5.3
	154335_at|CG8286	7.3			152512_at|Treh	6.25			152147_at|CG4592	5.6			144984_at|CG2200	6.125			150762_at|betaTub97EF	5.3
	152069_at|sno	7.3			152568_at|CG2493	6.25			149615_at|CG3940	5.6			154336_at|AnnX	6.125			151952_at|CG6465	5.3
	146130_at|CG4901	7.3			154272_at|fbl	6.25			145692_at|CG12400	5.6			151909_at|CG6287	6.125			147008_at|CG13210	5.3
	151787_at|CG5899	7.3			144191_at|VhaSFD	6.25			154916_at|Tab2	5.6			154362_at|CG2976	6.125			152232_at|CG8728	5.3
	143910_at|Cbl	7.3			155081_at|JhI-26	6.25			142934_at|CG4646	5.6			145151_at|mRpL3	6.125			154264_at|Ef1beta	5.3
	153417_at|CG5823	7.3			147049_at|rho-7	6.25			145466_at|CG32521	5.6			147176_at|CG16935	6.125			148690_at|mRpL20	5.3
	143563_at|zip	7.3			152323_at|CG8417	6.25			151970_at|Vps28	5.6			142457_at|CG10340	6.125			152442_at|CG31233	5.3
	153051_at|CG4841	7.3			141412_at|CG6891	6.25			152482_at|CG11594	5.6			154244_at|Gapdh1	6.125			145100_at|CG9065	5.3
	147364_at|CG14478	7.3			153706_at|Slip1	6.16667			150515_at|CG6607	5.6			142173_s_at|---	6.125			148206_at|CG13704	5.3
	142840_s_at|brm	7.3			153213_at|CG7324	6.16667			155148_at|CG10527	5.6			153392_at|CG18854	6.125			155089_at|CG1635	5.3
	153289_at|CG8446	7.2			141512_at|CG33116	6.16667			143771_at|trc	5.6			153483_at|CG1249	6.125			144233_at|CG13845	5.3
	151804_at|CG9836	7.2			141740_at|CG7943	6.16667			142507_s_at|CG3800	5.6			153728_at|Ance	6.125			147265_at|CG8249	5.3
	151885_at|CG9009	7.2			155140_at|REG	6.16667			155105_at|CG5961	5.6			145146_at|l(1)G0136	6.125			152521_at|CG1441	5.3
	142180_at|CG6359	7.2			141810_at|Nc73EF	6.16667			145235_at|CG5162	5.6			144565_at|CG6067	6.125			151956_at|CG1809	5.3
	154876_at|CG14646	7.2			151754_at|rhea	6.16667			146426_at|CG5758	5.6			143341_at|Jon99Ci	6.125			145755_at|Psf2	5.3
	142590_at|CG9066	7.2			152021_at|Hrb87F	6.16667			150047_at|CG5169	5.6			152785_at|CG11200	6.125			152937_at|Cyp4ac1	5.3
	142548_at|CG9000	7.2			153041_at|Vha55	6.16667			141753_at|CG3368	5.6			152102_at|CG9119	6.125			145988_at|lectin-28C	5.3
	154304_at|CG3618	7.2			153747_at|drk	6.16667			141543_at|l(2)not	5.6			154657_at|CG7878	6.125			141793_at|NtR	5.3
	153949_at|CG2608	7.2			153997_at|Vha100-1	6.16667			154505_at|CG9107	5.6			142433_at|CG2811	6.125			143872_at|Aph-4	5.3
	151595_at|CG32056	7.2			143657_at|OstStt3	6.16667			145192_at|CG13014	5.6			143687_at|Arp87C	6.125			144000_at|arg	5.3
	154103_at|Tsf2	7.2			144181_at|Cdk5alpha	6.16667			150910_at|dj-1beta	5.6			141527_at|Tequila	6.125			151556_s_at|CG33115	5.3
	142895_at|oxt	7.2			144336_at|gammaCop	6.16667			145810_at|CG5828	5.6			148054_at|CG16985	6.125			149700_at|CG6834	5.3
	147834_at|eIF-5A	7.2			141359_at|CG3702	6.16667			148295_at|CG9953	5.5			142158_at|VhaPPA1-1	6.125			152721_at|Idgf1	5.3
	151650_at|CG18542	7.2			143164_at|Fps85D	6.16667			152401_at|CG7830	5.5			149305_at|CG1124	6.125			150901_at|CG9702	5.3
	143681_at|Sep1	7.2			153765_at|poly	6.16667			154791_at|CG14207	5.5			147835_at|RpL12	6.125			142657_at|PGRP-SB1	5.3
	142898_at|CG5708	7.2			154379_at|CG9304	6.16667			144586_at|CG3566	5.5			150994_at|CG11077	6.125			150398_at|CG4725	5.3
	153053_at|CG8195	7.2			146315_at|CG5682	6.16667			153711_at|CG9320	5.5			141547_at|Zw	6.0625			150274_at|CG4000	5.3
	154059_at|CG7115	7.2			154874_at|JhI-21	6.16667			153483_at|CG1249	5.5			147946_at|CG13890	6.0625			152135_at|CG33119	5.3
	154152_at|Mcr	7.2			142143_at|wun	6.16667			144358_at|MED22	5.5			152962_at|Jafrac2	6.0625			152501_at|Thiolase	5.2
	153317_at|Ip259	7.2			143723_at|Cyp6a9	6.16667			154957_at|Srp68	5.5			142834_at|Irp-1A	6.0625			141298_at|CG9186	5.2
	148218_at|CG10635	7.2			143314_at|Pros35	6.16667			144581_at|CG3774	5.5			145955_at|CG5261	6.0625			144663_at|CG18624	5.2
	143194_at|Hsc70-4	7.2			154218_at|Gdh	6.16667			144709_at|CG11284	5.5			149196_at|CG32444	6.0625			151903_at|und	5.2
	144106_at|Eph	7.2			143903_at|Surf4	6.16667			154830_at|CG5112	5.5			155023_at|HDAC6	6.0625			141815_at|PHGPx	5.2
	148367_at|Srp9	7.2			153158_at|cl	6.16667			143845_at|Rab6	5.5			152331_at|CG5045	6.0625			148955_at|CG7603	5.2
	152899_at|smi35A	7.2			147564_at|CG16799	6.16667			142587_at|CG33099	5.5			144712_at|Hexo2	6.0625			142165_at|CG3625	5.2
	153843_at|tacc	7.2			154262_at|GlyP	6.16667			153508_at|U2af50	5.5			142232_at|nmd	6.0625			154791_at|CG14207	5.2
	154654_at|psq	7.2			142408_at|CG4729	6.16667			152066_at|Aats-asn	5.5			143845_at|Rab6	6.0625			153198_at|CG7382	5.2
	152121_s_at|CG5009	7.1			152903_at|CG6028	6.16667			143427_at|Tm2	5.5			148638_at|CAH2	6.0625			147221_at|CG12859	5.2
	141639_at|CG1640	7.1			143301_at|Pgk	6.16667			153198_at|CG7382	5.5			141685_at|Sp7	6.0625			148055_at|CG16986	5.2
	154660_at|CG3887	7.1			143691_at|Gip	6.16667			149312_at|CG2604	5.5			154374_at|Txl	6.0625			144581_at|CG3774	5.2
	153688_at|CG16718	7.1			141759_at|vap	6.08333			148638_at|CAH2	5.5			150331_at|CG6637	6.0625			148422_at|CG5804	5.2
	142975_at|Myo31DF	7.1			153015_i_at|CG31534	6.08333			142134_at|CG11576	5.5			144971_at|mRpL49	6.0625			145140_at|CG9240	5.2
	141770_at|uzip	7.1			141508_at|CG11247	6.08333			146905_at|CG1665	5.5			154164_at|Aats-lys	6.0625			151667_s_at|CG6673	5.2
	142241_at|CG7870	7.1			154356_at|G-salpha60A	6.08333			153244_at|CG8635	5.5			142776_at|CG17680	6.0625			153347_at|Gpdh	5.2
	150126_at|eIF-1A	7.1			141224_at|CG6838	6.08333			152312_at|l(2)k05713	5.5			153990_at|GstS1	6.0625			142318_at|CG17919	5.2
	152753_at|sec10	7.1			153686_at|Pp2A-29B	6.08333			153728_at|Ance	5.5			153820_at|CG6921	6.0625			142649_at|Aats-tyr	5.2
	143733_at|His4r	7.1			154980_at|CG11596	6.08333			141685_at|Sp7	5.5			155026_at|CG5599	6.0625			152382_at|CG7149	5.2
	153500_at|CG11984	7.1			153821_at|CG16975	6.08333			145202_at|CG9673	5.5			154419_at|CaBP1	6.0625			143678_at|PebIII	5.2
	154653_at|Lac	7.1			142553_at|CG5640	6.08333			153247_at|l(2)k14505	5.5			154115_at|CG12264	6.0625			142696_at|CG8801	5.2
	141255_at|FKBP59	7.1			153957_at|CG9044	6.08333			148664_at|vih	5.5			149467_at|CG2791	6.0625			153419_at|ine	5.2
	143059_at|Act42A	7.1			154263_at|CG7705	6.08333			147187_at|CG8323	5.5			152013_at|CG5867	6.0625			150210_at|CG6195	5.2
	153111_at|Tsp86D	7.1			154709_at|CG1703	6.08333			153149_at|Rbp1	5.5			144148_at|CG1315	6.0625			143068_at|Amy-d	5.2
	142749_at|Ac3	7.1			147498_at|CalpA	6.08333			149672_at|nocturnin	5.5			143550_at|RpL7	6.0625			145702_at|CG15408	5.2
	154893_at|gammaTub23C	7.1			146628_at|CG14464	6.08333			154683_at|mRpL19	5.5			152541_at|CG5355	6.0625			143682_at|Tig	5.2
	153578_at|Tudor-SN	7.1			154296_at|Aly	6.08333			143746_at|RpL7A	5.5			154208_at|CG16721	6.0625			144845_at|CG15203	5.2
	142924_at|wee	7.1			151460_i_at|---	6.08333			155020_at|Trap1	5.5			141212_at|Tim10	6.0625			143793_at|Srp19	5.2
	155022_at|Hem	7.1			153879_at|RanGap	6.08333			152195_at|Snr1	5.5			151888_at|MP1	6.0625			153429_at|CG1561	5.2
	142879_at|dock	7.1			151595_at|CG32056	6.08333			154827_at|Ubp64E	5.5			141208_at|Cpr	6.0625			143891_at|T3dh	5.2
	150866_at|CG7911	7.1			154103_at|Tsf2	6.08333			153189_at|CG1291	5.5			152905_at|CG30344	6.0625			152086_at|CG6409	5.2
	143836_at|Hmu	7.1			141765_at|sgl	6.08333			149339_at|CG2931	5.5			146699_at|Spn4	6			154669_at|CG5080	5.2
	151671_at|CG17912	7.1			154381_at|CG10724	6.08333			146888_at|CG1888	5.5			152402_at|Nacalpha	6			154290_at|CG11241	5.2
	141248_at|dlp	7.1			153755_at|CG8408	6.08333			141457_at|Mtor	5.5			142269_at|porin	6			150180_at|Cyp12a5	5.2
	143361_at|beta-Spec	7.1			154424_at|CG8062	6.08333			151813_at|Tsp42Ej	5.5			150385_at|mRpL45	6			151817_at|CG8329	5.2
	154684_at|CG8155	7.1			145650_at|CG3214	6.08333			146687_at|CG9422	5.5			154259_at|Spn27A	6			148995_at|CG4306	5.2
	146623_at|Tif-IA	7.1			150964_at|krz	6.08333			152612_at|Aplip1	5.5			152147_at|CG4592	6			147434_at|GstE10	5.2
	142797_at|H	7.1			153637_at|Prosbeta5	6.08333			142420_at|CG12056	5.5			154566_at|Ciao1	6			146723_at|---	5.2
	153846_at|CG5746	7.1			154280_at|CG3776	6.08333			142234_at|eIF6	5.5			149421_at|CG1939	6			142174_at|CG32573	5.2
	141232_at|CG5044	7			154644_at|ProsMA5	6.08333			144077_at|CG13367	5.5			151805_at|Reg-3	6			153075_at|CG1773	5.2
	151522_at|Mdh	7			144595_at|CG3446	6.08333			154907_at|CG11309	5.4			142951_at|CG7916	6			141639_at|CG1640	5.1
	152401_at|CG7830	7			154269_at|Acon	6.08333			152115_at|CG1309	5.4			154062_at|CG41469	6			142421_at|CG6766	5.1
	143940_at|Gap69C	7			141465_at|CG10026	6.08333			142796_at|CG8306	5.4			147422_at|CG14500	6			153765_at|poly	5.1
	154555_at|CG10098	7			152519_at|CG8776	6.08333			152088_at|CG5508	5.4			149138_at|CG4858	6			152515_at|Pgi	5.1
	149420_at|CG1943	7			154994_at|clt	6.08333			142434_at|Tina-1	5.4			154335_at|CG8286	6			152681_at|CG12384	5.1
	143212_at|l(1)10Bb	7			153656_at|CG30499	6.08333			147691_at|CG2852	5.4			154300_at|CG12034	6			153615_at|CG1637	5.1
	146463_at|CG15168	7			147436_at|GstE3	6.08333			142194_at|CG9527	5.4			141528_at|Vha16	6			153435_at|blw	5.1
	154884_at|CG8602	7			153990_at|GstS1	6.08333			142520_at|Atpalpha	5.4			152306_at|CG32626	6			151370_at|CG17776	5.1
	143739_at|Pdi	7			146708_at|Tsp42Ed	6.08333			153422_at|Vha44	5.4			152325_at|Lsd-1	6			147379_at|CG14483	5.1
	152365_at|Rpn5	7			144430_at|CG3939	6.08333			152689_at|CG5339	5.4			142357_at|CG14812	6			152452_at|Idgf2	5.1
	153243_at|lwr	7			153318_at|bgm	6.08333			151808_at|l(3)02640	5.4			153184_at|CG32803	6			149345_at|CG12171	5.1
	142232_at|nmd	7			146698_at|coro	6.08333			141370_at|ppl	5.4			154218_at|Gdh	6			154343_at|CG9509	5.1
	154717_at|CG4840	7			154037_at|CG14722	6			153010_at|Chmp1	5.4			142757_at|Dhod	6			146379_at|Ugt36Bc	5.1
	151572_r_at|G-oalpha47A	7			142605_at|CG33095	6			152717_at|CG3835	5.4			151760_at|CG8468	6			155026_at|CG5599	5.1
	145871_at|CG13993	7			154471_at|par-6	6			145146_at|l(1)G0136	5.4			152591_at|CG11395	6			153188_at|Spase18-21	5.1
	141511_at|dos	7			151506_at|CG9047	6			154265_at|CG8258	5.4			148436_at|CG5651	6			154018_at|CG7686	5.1
	152440_at|l(2)37Cc	7			154030_at|fl(2)d	6			152160_at|Hr78	5.4			154968_at|CG5168	6			142147_at|CG9466	5.1
	141212_at|Tim10	7			153645_at|Su(var)3-9	6			152921_at|Moca-cyp	5.4			153115_at|CG5214	6			148234_at|CG10575	5.1
	143741_at|Ptp69D	7			146135_at|CG5604	6			149035_at|CG14084	5.4			152298_at|Rheb	6			145177_at|CG3560	5.1
	146621_at|RpL21	7			141551_at|CG3689	6			153382_at|CG3957	5.4			154768_at|CG5482	6			141349_at|CG6981	5.1
	155165_at|tho2	7			141782_at|ik2	6			145680_at|CG31694	5.4			150039_s_at|CG17556	5.9375			145784_at|mRpS2	5.1
	151751_at|Dyb	7			151620_at|nuf	6			151800_at|CG4847	5.4			147725_at|asrij	5.9375			146467_at|RpL30	5.1
	154109_at|faf	7			143528_at|plx	6			142381_at|CG12404	5.4			152385_at|Aats-gln	5.9375			153582_at|CG13101	5.1
	155009_at|Topors	7			151021_at|CG11985	6			148165_at|CG1316	5.4			153618_at|Dmn	5.9375			141807_at|bsf	5.1
	155096_at|CG17149	7			154081_at|mod	6			146496_at|CG10195	5.4			144868_at|CG11752	5.9375			143617_at|RpL27A	5.1
	142592_at|stau	7			143390_at|betaTub56D	6			144565_at|CG6067	5.4			153176_at|mRpL10	5.9375			142950_at|CG7953	5.1
	146153_at|CG31716	7			141704_at|MRP	6			145908_at|CG11015	5.4			154393_at|CG4364	5.9375			146559_at|CG9336	5.1
	143472_at|Ten-m	7			153699_at|SsRbeta	6			143341_at|Jon99Ci	5.4			141292_at|CG1236	5.9375			143812_at|oho23B	5.1
	149260_s_at|Chro	7			143212_at|l(1)10Bb	6			148835_at|CG10516	5.4			153876_at|RpL19	5.9375			152650_at|CG16820	5.1
	141569_at|CG10192	7			146463_at|CG15168	6			153419_at|ine	5.4			152529_at|CG11227	5.9375			151003_at|Buffy	5.1
	141434_at|CG13887	6.9			154884_at|CG8602	6			147967_at|CG9149	5.4			151458_at|CG31676	5.9375			149964_at|CG14872	5.1
	153847_at|CG32446	6.9			146132_at|CG5676	6			141450_at|Sodh-1	5.4			154198_at|Tango7	5.9375			150910_at|dj-1beta	5.1
	142844_at|Gint3	6.9			153544_at|mRpL24	6			154861_at|asf1	5.4			154350_at|CG8525	5.9375			144046_at|CG2680	5.1
	154495_at|CG6459	6.9			141593_at|CG5798	6			152855_at|kermit	5.4			141255_at|FKBP59	5.9375			152005_at|CG7077	5.1
	150300_at|CG5802	6.9			152663_at|CG8707	6			142893_at|Rtnl1	5.4			142237_at|CG11790	5.9375			145101_at|CG15027	5.1
	153757_at|CG5515	6.9			141601_at|eIF2B-gamma	6			151873_at|CG9865	5.4			153699_at|SsRbeta	5.9375			146528_at|CG10659	5.1
	152791_at|Hs2st	6.9			141301_at|tok	6			151832_at|Oat	5.4			147564_at|CG16799	5.9375			146449_at|Irk3	5.1
	144336_at|gammaCop	6.9			153692_at|Su(var)205	6			142262_at|CG1623	5.4			146946_s_at|CG12896	5.9375			143321_at|Rh4	5.1
	146132_at|CG5676	6.9			155164_at|Sras	6			154566_at|Ciao1	5.4			147561_at|maf-S	5.9375			147525_at|CG16898	5.1
	146709_at|Tsp42Ee	6.9			153458_at|Rep	6			152660_at|CG9672	5.4			153581_at|KdelR	5.9375			147669_at|CG5819	5.1
	154593_at|CG15118	6.9			154585_at|ash2	6			142350_at|yellow-f2	5.4			143311_at|PpV	5.9375			152836_at|GRHR	5.1
	152509_at|CG8613	6.9			155056_at|Prosbeta2	6			142414_at|CG11315	5.4			146461_at|CG10621	5.9375			148013_at|CG1887	5.1
	143588_at|HmgZ	6.9			142571_at|l(2)s5379	6			153743_at|CG2656	5.4			155085_at|CG11980	5.9375			144167_at|CG4325	5.1
	151831_at|gem	6.9			150278_at|CG17272	6			149507_at|mRpS18A	5.4			152027_at|Ance-5	5.9375			145881_at|CG9486	5.1
	153986_at|lbk	6.9			151923_at|SelG	6			147681_at|CG6018	5.4			142318_at|CG17919	5.9375			145620_at|CG4259	5.1
	141466_at|CG15099	6.9			149305_at|CG1124	6			152394_at|CG5428	5.4			151658_at|Amph	5.9375			153134_at|ND23	5
	151997_at|CaMKI	6.9			142842_at|CG1532	6			150721_at|woc	5.4			152368_at|Irc	5.9375			152504_at|Pglym78	5
	149974_at|Acyp2	6.9			143313_at|Pros29	6			148690_at|mRpL20	5.4			141664_at|Hsp60	5.875			153348_at|CG4769	5
	149113_at|CG6597	6.9			144037_at|Irp-1B	6			141325_at|CG2147	5.4			142784_at|CG9797	5.875			143870_at|ATPsyn-Cf6	5
	154451_at|CG2691	6.9			151903_at|und	6			151780_at|CG7993	5.4			154786_at|CG18522	5.875			151875_at|Sod2	5
	151634_at|Trn	6.9			141443_at|Oscillin	6			142908_at|CG13605	5.4			149797_at|CG12279	5.875			143912_at|ATPCL	5
	153938_at|Atg1	6.9			142310_at|alpha-Est7	6			147737_at|CG9890	5.4			153188_at|Spase18-21	5.875			141768_at|Adk2	5
	141504_at|Khc	6.9			148646_at|VhaSFD	6			142953_at|CG9675	5.4			145265_at|CG6762	5.875			154396_at|Aats-phe	5
	142125_at|egh	6.9			152504_at|Pglym78	6			141536_at|Sply	5.3			147766_at|CG3500	5.875			147378_at|CG14482	5
	154333_at|Fas1	6.9			146911_at|CG12140	6			146619_i_at|Mgstl	5.3			155147_at|CG1307	5.875			149683_at|CG6719	5
	141591_at|RhoGEF2	6.9			152752_at|CG3829	6			142548_at|CG9000	5.3			152416_at|Ent2	5.875			148796_at|CG6878	5
	154142_at|zf30C	6.9			142538_at|GstE7	6			147055_at|CG18343	5.3			146748_at|CG1598	5.875			146053_at|Tsp29Fb	5
	143073_at|aop	6.9			148244_at|CG33523	6			153637_at|Prosbeta5	5.3			142531_at|eIF-2beta	5.875			145818_s_at|cype	5
	148285_at|CG8368	6.9			152334_at|Tpi	6			142310_at|alpha-Est7	5.3			153508_at|U2af50	5.875			154342_at|CG12304	5
	151638_s_at|stau	6.9			141699_at|CG3056	5.91667			153903_at|Rpn9	5.3			142561_at|l(3)s1921	5.875			153026_at|CG8057	5
	154511_at|CG8378	6.88889			143335_at|Scm	5.91667			154374_at|Txl	5.3			150580_at|CG31098	5.875			149871_at|CG3153	5
	153943_at|Ent1	6.8			153251_at|fat2	5.91667			144787_at|l(1)G0230	5.3			154018_at|CG7686	5.875			152962_at|Jafrac2	5
	141768_at|Adk2	6.8			154667_at|D1	5.91667			147274_at|CG8397	5.3			146339_at|CG9267	5.875			150385_at|mRpL45	5
	146906_at|CG1599	6.8			141666_at|CG11844	5.91667			142853_at|Prosalpha7	5.3			143270_at|Mov34	5.875			147422_at|CG14500	5
	153299_at|spict	6.8			155036_at|CG1416	5.91667			149868_at|CG3061	5.3			142649_at|Aats-tyr	5.875			148886_at|mRpS34	5
	142545_at|RpA-70	6.8			151567_at|CG1607	5.91667			141257_at|Gs1	5.3			141658_at|CG5853	5.875			153289_at|CG8446	5
	153351_at|CG8331	6.8			152206_at|CG12024	5.91667			151932_at|Cyt-b5-r	5.3			154381_at|CG10724	5.875			143746_at|RpL7A	5
	151929_at|CG30392	6.8			151697_at|raps	5.91667			146307_at|A16	5.3			151849_at|Uch	5.875			152271_at|RpL36	5
	150308_at|AP-2sigma	6.8			152543_at|CG2025	5.91667			149582_at|Snap24	5.3			152752_at|CG3829	5.875			153994_at|RpS24	5
	153624_at|MESR3	6.8			142514_at|TfIIFbeta	5.91667			146898_at|CG12926	5.3			153980_at|ApepP	5.875			152367_at|CG9319	5
	153483_at|CG1249	6.8			153282_at|CG6983	5.91667			148532_at|---	5.3			150404_at|CG17244	5.875			143660_at|thetaTry	5
	141256_at|mus210	6.8			152242_at|atl	5.91667			151838_at|CG2789	5.3			143303_at|CG18853	5.875			154529_at|CG10576	5
	143927_at|Fak56D	6.8			152053_at|CG13124	5.91667			143218_at|l(2)35Bg	5.3			150516_at|CG13623	5.875			143241_at|LvpD	5
	152404_at|FucT6	6.8			141255_at|FKBP59	5.91667			154728_at|mRpS7	5.3			154820_at|jagn	5.875			146532_at|fok	5
	154767_at|CG11055	6.8			143739_at|Pdi	5.91667			152232_at|CG8728	5.3			141436_at|CG3505	5.875			150702_at|CG6283	5
	142692_at|Hel25E	6.8			152365_at|Rpn5	5.91667			145681_at|CG31694	5.3			142199_at|CG3091	5.875			142122_at|7B2	5
	141202_at|qkr58E-3	6.8			153243_at|lwr	5.91667			145071_at|mRpS25	5.3			148668_at|CG10688	5.875			152817_at|CG1648	5
	151742_at|CG12004	6.8			153483_at|CG1249	5.91667			144485_at|mRpL30	5.3			152820_at|CG9099	5.875			142479_at|GstE8	5
	152190_at|phtf	6.8			151618_at|Unc-76	5.91667			142472_at|RpL3	5.3			146216_at|l(2)06225	5.875			149468_at|CG2781	5
	153701_at|gft	6.8			153040_at|CG17765	5.91667			146335_at|loqs	5.3			147843_at|mRpS17	5.875			151533_at|CG31148	5
	141268_at|CG32486	6.8			153560_at|Atg8a	5.91667			143854_at|Drip	5.3			154294_at|CG1837	5.875			148888_at|CG4893	5
	141650_at|CG11526	6.8			143139_at|eas	5.91667			152106_at|CG7556	5.3			152547_at|Vps32	5.875			150876_at|CG1983	5
	153859_at|su(Hw)	6.8			148273_at|CG13298	5.91667			148311_f_at|CG8628	5.3			155074_at|CG7530	5.875			147187_at|CG8323	5
	151613_at|stai	6.8			143830_at|CanB2	5.91667			154052_at|Rpn1	5.3			142454_at|mRpL12	5.8125			146507_at|CG13077	5
	154904_at|BRWD3	6.8			142829_at|CG6961	5.91667			153498_at|sec13	5.3			143933_at|Rack1	5.8125			145844_at|CG11147	5
	154756_at|ras	6.8			153233_at|CG6357	5.91667			154935_at|mRpS29	5.3			154683_at|mRpL19	5.8125			147514_at|Obp56a	5
	141218_at|Hrb27C	6.8			152880_at|nemy	5.91667			155100_at|CG1240	5.3			149035_at|CG14084	5.8125			144853_at|CG15201	5
	154462_at|X11L	6.8			149275_at|CG11739	5.91667			150815_at|Ef1gamma	5.3			152365_at|Rpn5	5.8125			145595_at|mRpL48	5
	154073_at|CG11583	6.8			149341_at|CG1427	5.91667			152493_at|---	5.3			141698_at|Spp	5.8125			141755_at|mRpL54	5
	143231_at|Lam	6.8			151736_at|CAP	5.91667			146191_at|CG6724	5.3			142488_s_at|CG14715	5.8125			146726_at|nec	5
	143665_at|fra	6.8			154187_at|gcl	5.91667			142561_at|l(3)s1921	5.3			150424_at|CG6733	5.8125			142254_at|CG10562	5
	152964_at|CG8485	6.8			142586_at|CG5346	5.91667			152352_at|sip3	5.3			146906_at|CG1599	5.8125			147686_at|RpS16	5
	141683_at|CG5874	6.8			151963_at|CG3714	5.91667			148366_at|CG8111	5.3			148211_at|CG10674	5.8125			151780_at|CG7993	5
	141288_at|hyx	6.8			154397_at|CG8531	5.91667			141228_at|CG11982	5.3			151445_at|CG6115	5.8125			154890_at|CG10657	5
	151656_at|unc-5	6.8			151496_s_at|CG14526	5.91667			145803_at|CG31917	5.3			147436_at|GstE3	5.8125			145731_at|CG16712	5
	151869_at|CG2446	6.8			151760_at|CG8468	5.91667			150680_at|CG5484	5.3			142180_at|CG6359	5.8125			148144_at|CG14990	5
	154648_at|mbo	6.8			154140_at|CG4713	5.91667			144072_at|CG16989	5.3			142147_at|CG9466	5.8125			152939_at|Fmo-1	5
	151998_at|CG10194	6.77778			152608_at|CG7054	5.91667			145872_at|Arc-p20	5.3			153299_at|spict	5.8125			148605_at|CG10361	5
	154860_at|stck	6.7			148955_at|CG7603	5.91667			144345_s_at|CG18166	5.3			152538_at|Scs-fp	5.8125			151209_at|CG15065	5
	141260_at|CG4572	6.7			141528_at|Vha16	5.91667			146447_at|CG10343	5.3			152425_at|Fmo-2	5.8125			152209_at|CG5703	4.9
	153399_at|CG11306	6.7			142776_at|CG17680	5.91667			143744_at|Rlc1	5.3			141694_at|CG6016	5.8125			141356_at|CG7430	4.9
	143104_at|cni	6.7			143875_at|Ipp	5.91667			143018_at|tko	5.3			154148_at|eRF1	5.8125			141757_at|CG1907	4.9
	153381_at|CG5973	6.7			153326_at|CG9140	5.91667			152556_at|Ser7	5.3			141697_at|Gel	5.8125			153131_at|CG2915	4.9
	141765_at|sgl	6.7			153664_at|CG12746	5.91667			150431_at|Ir	5.3			143397_at|RpL40	5.8125			153664_at|CG12746	4.9
	141618_at|Karybeta3	6.7			142661_at|Vha100-2	5.91667			149554_at|RpL34b	5.3			149633_at|CG14688	5.8			152070_at|CG10992	4.9
	147830_at|CG3907	6.7			152306_at|CG32626	5.91667			145520_at|CG3645	5.3			143000_at|CG5525	5.75			154892_at|CG11208	4.9
	154255_at|Uch-L3	6.7			152336_at|DNaseII	5.91667			149781_at|trus	5.3			148234_at|CG10575	5.75			150467_at|CG10219	4.9
	153252_at|CG3847	6.7			142390_at|CG3246	5.91667			147206_at|L	5.3			154013_at|CG1753	5.75			143150_at|Eno	4.9
	153113_at|CG11009	6.7			152584_at|CG7834	5.91667			149185_at|CG33214	5.3			147131_at|Spt-I	5.75			142871_s_at|CG9911	4.9
	142237_at|CG11790	6.7			152211_at|CG6950	5.91667			149682_at|mRpL40	5.3			142892_at|Rtnl1	5.75			143033_at|Gal	4.9
	143656_at|Rsf1	6.7			152837_at|CG4685	5.91667			142846_at|Zpr1	5.3			154320_at|Jra	5.75			144595_at|CG3446	4.9
	153967_at|CG10395	6.7			142709_s_at|CG6543	5.91667			145210_at|mRpL22	5.3			153017_at|CG5989	5.75			141478_at|Cyp1	4.9
	154832_at|Hrb98DE	6.7			144675_at|CG2254	5.91667			152458_at|Gyk	5.2			143940_at|Gap69C	5.75			142911_at|Sucb	4.9
	151918_s_at|drpr	6.7			154110_at|CG12262	5.91667			152304_at|CG11963	5.2			142674_at|Snx6	5.75			148040_at|CG8993	4.9
	147940_at|CG13900	6.7			141563_at|Acox57D-p	5.90909			153351_at|CG8331	5.2			149687_at|CG6764	5.75			150603_at|CG5028	4.9
	152037_at|CG33057	6.7			151866_at|epsin-like	5.83333			154406_at|CG8229	5.2			141617_at|128up	5.75			154260_at|CG4882	4.9
	153107_at|CG10981	6.7			141203_at|CG2947	5.83333			152788_at|Aats-thr	5.2			152225_at|kraken	5.75			143341_at|Jon99Ci	4.9
	154681_at|CG31650	6.7			154911_at|SF2	5.83333			155030_at|Mtch	5.2			148556_at|CG7638	5.75			154335_at|CG8286	4.9
	154758_at|sws	6.7			153811_at|lolal	5.83333			141815_at|PHGPx	5.2			148886_at|mRpS34	5.75			154218_at|Gdh	4.9
	143692_at|Dhh1	6.7			152917_at|CG7628	5.83333			152365_at|Rpn5	5.2			147469_at|CG15098	5.75			141658_at|CG5853	4.9
	154619_at|her	6.7			142482_at|CLIP-190	5.83333			143635_at|l(3)03670	5.2			154895_at|CG6523	5.75			142454_at|mRpL12	4.9
	141663_at|CG9715	6.7			153502_at|e(r)	5.83333			151972_at|CG8206	5.2			141425_at|Srp72	5.75			149035_at|CG14084	4.9
	142919_s_at|Pkn	6.7			154003_at|exba	5.83333			148216_at|Uev1A	5.2			154771_at|prel	5.75			152274_at|CG10650	4.9
	151570_at|CG31248	6.7			143892_at|RpS3A	5.83333			150331_at|CG6637	5.2			145177_at|CG3560	5.75			148003_at|mRpL46	4.9
	141516_at|CG5148	6.7			154026_at|Snap	5.83333			141458_at|CG9342	5.2			141465_at|CG10026	5.75			151481_s_at|l(1)G0196	4.9
	154506_at|Srp54	6.7			141621_at|CG15609	5.83333			149607_at|CG12811	5.2			151950_at|Sptr	5.75			144392_at|CG14806	4.9
	155124_at|apt	6.7			154466_at|myoglianin	5.83333			154431_at|Acer	5.2			151794_at|TMS1	5.75			154265_at|CG8258	4.9
	141367_at|---	6.7			152417_at|Tbp-1	5.83333			147378_at|CG14482	5.2			149316_at|CG12173	5.75			145080_at|CG14407	4.9
	153884_at|CG10971	6.7			153292_at|CG7861	5.83333			148753_at|CG9238	5.2			151885_at|CG9009	5.75			149552_s_at|CG18473	4.9
	154274_at|CG30122	6.7			142895_at|oxt	5.83333			152669_at|pug	5.2			144245_at|Rpt3	5.6875			145025_at|CG12177	4.9
	153523_at|Pp2B-14D	6.7			143059_at|Act42A	5.83333			142399_at|CG9027	5.2			143767_r_at|His3.3A	5.6875			152312_at|l(2)k05713	4.9
	151667_s_at|CG6673	6.6			146709_at|Tsp42Ee	5.83333			152744_at|CG4692	5.2			145393_at|CG32528	5.6875			143775_at|iotaTry	4.9
	152357_at|Rab-RP4	6.6			141256_at|mus210	5.83333			153286_at|CG10737	5.2			152201_at|Tps1	5.6875			141327_at|CG8773	4.9
	153336_at|Aats-asp	6.6			150009_at|CG17931	5.83333			147608_at|CG4302	5.2			154952_at|CG6859	5.6875			144310_at|CG8997	4.9
	153169_at|CG9917	6.6			153733_at|Plc21C	5.83333			145798_at|CG8885	5.2			145309_at|Aats-his	5.6875			152865_at|Cyp4d8	4.9
	153817_at|sqh	6.6			143632_at|Srp54k	5.83333			141698_at|Spp	5.2			142885_at|CG10166	5.6875			148647_at|Pbgs	4.9
	153496_at|Ggamma1	6.6			150496_at|Spase22-23	5.83333			141789_at|Tom34	5.2			142381_at|CG12404	5.6875			146061_at|CG13102	4.9
	145183_at|CG9921	6.6			154149_at|CG6686	5.83333			150540_at|Nmnat	5.2			152660_at|CG9672	5.6875			149191_at|CG7172	4.9
	153669_at|CG10158	6.6			151959_at|Sip1	5.83333			141722_at|z	5.2			142472_at|RpL3	5.6875			154963_at|CG10237	4.9
	153115_at|CG5214	6.6			146133_at|CG18619	5.83333			153278_at|Cct5	5.2			150496_at|Spase22-23	5.6875			147699_at|CG4250	4.9
	147373_at|eIF3-S9	6.6			151723_at|CG7737	5.83333			142755_s_at|CG2061	5.2			141780_at|Cyp9c1	5.6875			143018_at|tko	4.9
	153355_at|CG2118	6.6			142498_at|CG1746	5.83333			152141_at|mRpS22	5.2			152370_at|CG3624	5.6875			149682_at|mRpL40	4.9
	151761_at|MTF-1	6.6			153903_at|Rpn9	5.83333			141307_at|CG4827	5.2			152608_at|CG7054	5.6875			142643_at|CG9520	4.9
	151618_at|Unc-76	6.6			153443_at|CG6022	5.83333			151616_i_at|CG32536	5.2			152178_at|SpdS	5.6875			144644_at|CG2059	4.9
	153040_at|CG17765	6.6			141682_at|cathD	5.83333			154747_at|Jheh3	5.2			141539_at|Trx-2	5.6875			148332_at|CG8562	4.9
	150009_at|CG17931	6.6			153002_at|Timp	5.83333			150759_at|CG4963	5.2			152274_at|CG10650	5.6875			154435_at|CG7168	4.9
	151599_at|RhoGEF3	6.6			153049_at|DppIII	5.83333			153876_at|RpL19	5.2			142498_at|CG1746	5.6875			148804_at|CG7272	4.9
	154306_at|CG7414	6.6			152679_at|CG10550	5.83333			145121_at|CG6299	5.2			153574_at|ARP-like	5.6875			146214_at|CG16743	4.9
	146265_at|Tom70	6.6			152648_at|CG2736	5.83333			151263_at|CG7630	5.2			151839_at|vir-1	5.6875			144963_at|CG32647	4.9
	143205_at|janA	6.6			153400_at|CG1129	5.83333			144971_at|mRpL49	5.2			152431_at|CG17841	5.6875			152075_at|CG3700	4.9
	153705_at|CG2135	6.6			150488_at|CG5510	5.83333			142541_at|mRpL14	5.2			141629_at|eIF-4E	5.6875			153369_at|eIF2B-alpha	4.9
	150435_at|CG4449	6.6			152905_at|CG30344	5.83333			154533_at|CG11802	5.2			150300_at|CG5802	5.6875			147433_at|CG15067	4.9
	154942_at|CG17033	6.6			152225_at|kraken	5.83333			144549_at|CG3097	5.2			153310_at|CG3436	5.6875			146716_at|Tsp42Eo	4.9
	141267_at|CG7337	6.6			143877_at|Nurf-38	5.83333			148923_at|Lmpt	5.2			145412_at|CG12656	5.6875			146262_at|CG16965	4.9
	141798_at|Sbf	6.6			142190_at|Cyp6a21	5.83333			144049_at|Bem46	5.2			152382_at|CG7149	5.6875			148000_at|CG18173	4.9
	151737_at|CG32210	6.6			154688_at|CG8176	5.75			154274_at|CG30122	5.2			153608_at|MED9	5.6875			152256_at|CG2121	4.9
	154079_at|BCL7-like	6.6			141524_at|CG10289	5.75			154902_at|mule	5.2			152984_at|CG7011	5.6875			152196_at|CG10345	4.9
	151758_at|Mes2	6.6			148095_at|CG17737	5.75			149941_at|mRpS10	5.2			153289_at|CG8446	5.6875			152708_at|Hml	4.9
	149869_at|CG9922	6.6			154485_at|kel	5.75			146437_at|CG10178	5.2			154488_at|CG2316	5.6875			150848_at|CG7829	4.9
	153773_at|Mapmodulin	6.6			141598_at|CG10641	5.75			146313_at|DnaJ-H	5.2			151804_at|CG9836	5.6875			154737_at|Ndg	4.9
	142563_at|Paf-AHalpha	6.6			155109_at|CG7359	5.75			150881_at|RpS7	5.2			152822_at|Pink1	5.625			142258_at|CG12766	4.9
	145162_at|Ranbp16	6.6			141493_at|fog	5.75			150518_at|CG31126	5.2			144247_at|Rpn11	5.625			143358_at|Sod	4.8
	153933_at|CG10214	6.6			144109_at|Rlip	5.75			147287_at|CG15706	5.2			143908_at|Gs1l	5.625			154223_at|Trip1	4.8
	153793_at|CG32043	6.6			153825_at|Pur-alpha	5.75			144914_at|Cyp311a1	5.2			143374_at|T-cp1	5.625			142505_at|eIF-3p40	4.8
	154561_at|rin	6.6			147834_at|eIF-5A	5.75			145799_at|CG14043	5.2			148003_at|mRpL46	5.625			154728_at|mRpS7	4.8
	153646_at|Acf1	6.6			142232_at|nmd	5.75			144613_at|CG3168	5.2			152873_at|CG8596	5.625			151410_at|Neb-cGP	4.8
	147277_at|Dg	6.6			154717_at|CG4840	5.75			152968_at|CG5641	5.2			143642_at|RpL13	5.625			146652_at|CG17337	4.8
	149253_at|SPoCk	6.6			154511_at|CG8378	5.75			149029_at|CG6812	5.2			142303_at|Mdh	5.625			149213_at|CG7145	4.8
	153782_at|UGP	6.5			141618_at|Karybeta3	5.75			144347_at|CG13365	5.2			141458_at|CG9342	5.625			144047_at|eIF2B-beta	4.8
	152050_at|CG10512	6.5			147830_at|CG3907	5.75			147439_at|CG30118	5.2			152669_at|pug	5.625			152185_at|CG11876	4.8
	148295_at|CG9953	6.5			154255_at|Uch-L3	5.75			146775_at|CG12159	5.2			153278_at|Cct5	5.625			151495_at|CG2930	4.8
	148950_at|frc	6.5			141605_at|Pax	5.75			152972_at|CG1827	5.2			152116_at|Idgf3	5.625			143115_at|Cyt-c-p	4.8
	154661_at|mdy	6.5			150222_at|CG4686	5.75			148949_at|CG32174	5.2			150297_at|CG5793	5.625			144712_at|Hexo2	4.8
	145531_at|CG4164	6.5			151740_at|CG7033	5.75			150131_at|PKD	5.2			143572_at|Cyp4d1	5.625			152013_at|CG5867	4.8
	153234_at|CG7668	6.5			154147_at|CG4030	5.75			154138_at|CG6276	5.2			144699_at|CG1440	5.625			153876_at|RpL19	4.8
	152231_at|CG5594	6.5			146695_at|CG3287	5.75			142916_at|l(1)G0144	5.2			152614_at|CG14021	5.625			151445_at|CG6115	4.8
	148907_at|zetaCOP	6.5			153581_at|KdelR	5.75			142404_s_at|CG17230	5.2			147679_at|CG4752	5.625			151804_at|CG9836	4.8
	141359_at|CG3702	6.5			154602_at|htl	5.75			147593_at|CG3295	5.2			147189_at|mRpS16	5.625			143642_at|RpL13	4.8
	143164_at|Fps85D	6.5			148918_at|CG9669	5.75			150744_at|tau	5.2			152050_at|CG10512	5.625			143618_at|RpS18	4.8
	153765_at|poly	6.5			154024_at|Nap1	5.75			144862_at|CG1657	5.2			152376_at|CG2918	5.625			142685_at|mRpL36	4.8
	154379_at|CG9304	6.5			153574_at|ARP-like	5.75			144804_at|CG2889	5.2			145993_at|CG18591	5.625			152428_at|Phm	4.8
	154381_at|CG10724	6.5			154705_at|CG14232	5.75			151983_at|CG16936	5.1			143678_at|PebIII	5.625			144119_at|CG14817	4.8
	141614_at|CG8929	6.5			151864_at|hoe1	5.75			154383_at|CG10602	5.1			152126_at|CG3523	5.625			142333_at|bonsai	4.8
	144244_at|Rpt4	6.5			152490_at|nrv2	5.75			154275_at|CG12000	5.1			141573_at|CG17646	5.625			151845_at|wdp	4.8
	151735_at|Egfr	6.5			154017_at|CG6697	5.75			152081_at|CG5567	5.1			143618_at|RpS18	5.625			148973_at|Adgf-A	4.8
	146286_at|CG5446	6.5			154206_at|CG5315	5.75			152291_at|CG14290	5.1			154562_at|CG7197	5.625			154107_at|CG18012	4.8
	142186_at|Rpn6	6.5			154154_at|CG9393	5.75			154574_at|CG9172	5.1			148907_at|zetaCOP	5.625			150008_at|CG10311	4.8
	151942_at|CG15814	6.5			154529_at|CG10576	5.75			153290_at|Nmt	5.1			141806_at|CG32158	5.625			149569_at|CG9399	4.8
	154299_at|CG15141	6.5			144358_at|MED22	5.75			151897_at|Gclm	5.1			145970_at|TepII	5.625			146049_at|CG9463	4.8
	141790_at|Moe	6.5			142532_at|CG10627	5.75			143657_at|OstStt3	5.1			145183_at|CG9921	5.625			143249_at|RpS3	4.8
	152222_at|pgant3	6.5			145785_at|CG11926	5.75			141359_at|CG3702	5.1			153795_at|Kap-alpha3	5.625			143616_at|RpL18A	4.8
	155014_at|CG5262	6.5			152314_at|CG16979	5.75			153158_at|cl	5.1			153381_at|CG5973	5.625			145803_at|CG31917	4.8
	141222_at|CG14641	6.5			150008_at|CG10311	5.75			151923_at|SelG	5.1			151481_s_at|l(1)G0196	5.625			153207_at|mRpS31	4.8
	152158_at|CG3308	6.5			141544_at|Pvr	5.75			154397_at|CG8531	5.1			144701_at|CG12116	5.625			147447_at|mRpS28	4.8
	153363_at|CG7048	6.5			145612_at|NPC2	5.75			150496_at|Spase22-23	5.1			152631_at|th	5.5625			153296_at|Inos	4.8
	149186_at|Mkrn1	6.5			154616_at|CG31633	5.75			142863_at|CG5384	5.1			149322_at|CG1161	5.5625			148170_at|mRpS6	4.8
	141717_at|Syx5	6.5			153374_at|ogre	5.75			141475_at|CG11771	5.1			147918_at|mRpL17	5.5625			143011_at|CG4822	4.8
	153177_at|CG8710	6.5			141231_at|Rpn7	5.75			151908_at|CG8128	5.1			154364_at|CG4365	5.5625			153329_at|l(2)k14708	4.8
	150983_at|mav	6.5			147881_at|CG3683	5.75			154164_at|Aats-lys	5.1			154023_at|Pros54	5.5625			154098_at|RpII140	4.8
	153697_at|Lnk	6.5			143635_at|l(3)03670	5.75			152187_at|CG3321	5.1			143074_at|RpLP0	5.5625			142271_at|Ugt35b	4.8
	142525_at|CG11155	6.5			151972_at|CG8206	5.75			155121_at|CG1523	5.1			146764_at|CG18812	5.5625			154456_at|CG1542	4.8
	154428_at|gish	6.5			145666_at|CG2862	5.75			150580_at|CG31098	5.1			153247_at|l(2)k14505	5.5625			144902_at|CG15739	4.8
	143668_at|La	6.5			154859_at|CG17904	5.75			146772_at|CG12822	5.1			154397_at|CG8531	5.5625			150703_at|CG6277	4.8
	146333_at|Nnp-1	6.5			154892_at|CG11208	5.75			147615_at|CG10069	5.1			143599_at|Cdc42	5.5625			152778_at|CG2196	4.8
	154596_at|tgo	6.5			141701_at|CG2064	5.75			152826_at|CtBP	5.1			144392_at|CG14806	5.5625			147464_at|Cyp12b2	4.8
	142748_at|CG3680	6.5			144883_at|CG11699	5.75			153209_at|CG7598	5.1			142696_at|CG8801	5.5625			148836_at|CG17026	4.8
	143536_at|TfIIB	6.5			141672_r_at|CG17597	5.75			153759_at|rept	5.1			152709_at|Prat2	5.5625			145880_at|Ugt37b1	4.8
	154899_at|lid	6.5			145956_at|CG5958	5.75			151876_at|Reg-2	5.1			141620_at|RhoL	5.5625			153423_at|Pbprp2	4.8
	154864_at|CG1951	6.5			152261_at|CAH1	5.75			153207_at|mRpS31	5.1			141762_at|Cp1	5.5625			148536_at|CG7949	4.8
	148676_at|CG10948	6.5			141470_at|CG8963	5.66667			152529_at|CG11227	5.1			153098_at|CG16705	5.5625			141700_at|CG9590	4.8
	151759_s_at|CG12592	6.5			152373_at|CG9373	5.66667			152245_at|CG13335	5.1			143769_at|Mlp84B	5.5625			152524_at|CG3690	4.8
	142449_at|CG4957	6.5			152987_at|CG5077	5.66667			152269_at|CG7772	5.1			143271_at|Mp20	5.5625			146718_at|Tsp42Er	4.8
	151641_at|CG31673	6.4			151662_s_at|stc	5.66667			155157_at|CycG	5.1			144306_at|CG7532	5.5625			155092_at|CG5190	4.8
	152458_at|Gyk	6.4			153061_at|CG30421	5.66667			152715_at|CG1600	5.1			144700_at|CG15347	5.5625			153426_at|CG14523	4.8
	151016_at|CG9603	6.4			143636_at|dia	5.66667			151458_at|CG31676	5.1			153069_at|CG15096	5.5625			149798_at|CG5724	4.8
	147469_at|CG15098	6.4			149576_at|Pnn	5.66667			153217_at|sds22	5.1			141548_at|aru	5.5625			147188_at|CG18327	4.8
	153195_at|CG2846	6.4			152460_at|CG5807	5.66667			141229_at|Actr13E	5.1			145636_at|CG3597	5.5625			142320_at|antdh	4.8
	153823_at|Pmm45A	6.4			153870_at|tub	5.66667			149844_f_at|Act87E	5.1			149061_at|CG9330	5.5625			149457_at|CG10086	4.8
	154883_at|CG7979	6.4			153112_at|CG3065	5.66667			141281_at|Spt6	5.1			152700_at|CG30159	5.5625			150425_at|CG6738	4.8
	141271_at|CG1021	6.4			152472_at|cenB1A	5.66667			152283_at|CG32549	5.1			143708_at|TfIIA-S	5.5625			152919_at|CG11455	4.7
	149586_at|RpS29	6.4			151650_at|CG18542	5.66667			149470_at|CG2747	5.1			152616_at|CG9008	5.5625			152036_at|NP15.6	4.7
	154105_at|CG8233	6.4			153111_at|Tsp86D	5.66667			148805_at|CG7841	5.1			153507_at|CG3719	5.5625			153935_at|CG6370	4.7
	146315_at|CG5682	6.4			154593_at|CG15118	5.66667			149813_at|CG17327	5.1			152759_at|CG17549	5.5625			153336_at|Aats-asp	4.7
	153544_at|mRpL24	6.4			143927_at|Fak56D	5.66667			147799_at|CG4091	5.1			144016_at|NPC1	5.5625			153344_at|CG10664	4.7
	153560_at|Atg8a	6.4			141614_at|CG8929	5.66667			153238_at|CG32473	5.1			155139_at|CG18135	5.5625			145368_at|CG12203	4.7
	154494_at|CG5789	6.4			144244_at|Rpt4	5.66667			145370_at|l(1)G0156	5.1			146190_at|CG17124	5.5625			153260_at|Mipp1	4.7
	155085_at|CG11980	6.4			151735_at|Egfr	5.66667			146679_at|geminin	5.1			145507_at|galectin	5.5625			145097_at|CG5548	4.7
	147470_at|CG15083	6.4			154494_at|CG5789	5.66667			147080_at|CG8493	5.1			151663_at|CG32649	5.5625			153040_at|CG17765	4.7
	152411_at|CG10286	6.4			155085_at|CG11980	5.66667			147687_at|Vps20	5.1			143956_at|CG3760	5.5			141666_at|CG11844	4.7
	152874_at|CG30015	6.4			146663_at|PNGase	5.66667			148169_at|CG15014	5.1			150944_at|CG11334	5.5			142537_at|GstE6	4.7
	143974_at|RpL39	6.4			154547_at|CG7536	5.66667			142298_at|CG12214	5.1			144987_at|CG15717	5.5			146772_at|CG12822	4.7
	153901_at|CG6194	6.4			154957_at|Srp68	5.66667			144246_at|Rpn12	5.1			144212_at|Kr-h2	5.5			153443_at|CG6022	4.7
	141707_at|cpb	6.4			149351_at|CG2051	5.66667			141799_at|CG8051	5.1			151373_at|CG32795	5.5			141476_at|CG18324	4.7
	153226_at|36007	6.4			151566_at|CG4641	5.66667			144596_at|l(1)G0030	5.1			152464_at|Gfat2	5.5			141434_at|CG13887	4.7
	153887_at|Rab4	6.4			154047_at|CycK	5.66667			146100_at|CG13117	5.1			150762_at|betaTub97EF	5.5			145146_at|l(1)G0136	4.7
	141687_at|srp	6.4			146142_at|Sps2	5.66667			146053_at|Tsp29Fb	5.1			144163_at|CG14777	5.5			154419_at|CaBP1	4.7
	152526_at|CG8479	6.4			141425_at|Srp72	5.66667			148435_at|CG5021	5.1			145801_at|CG3792	5.5			142269_at|porin	4.7
	151677_at|CG32479	6.4			148662_at|CG10638	5.66667			142380_at|Vha68-1	5.1			149487_at|eIF4AIII	5.5			152416_at|Ent2	4.7
	141279_at|CG12006	6.4			141620_at|RhoL	5.66667			150534_at|CG3744	5.1			153538_at|CG8839	5.5			142885_at|CG10166	4.7
	154167_at|CG16817	6.4			144912_at|CG15735	5.66667			142822_at|CG10623	5.1			154957_at|Srp68	5.5			154397_at|CG8531	4.7
	152910_at|Dad	6.4			153588_at|exo70	5.66667			151148_at|CG12848	5.1			154265_at|CG8258	5.5			146759_at|mRpL52	4.7
	153237_at|CG12125	6.4			154077_at|CG31729	5.66667			152117_at|RpII33	5.1			149554_at|RpL34b	5.5			153366_at|CG10960	4.7
	142452_at|sqd	6.4			151475_at|debcl	5.66667			142926_at|SelD	5.1			152715_at|CG1600	5.5			143622_at|TpnC47D	4.7
	153076_at|CG7206	6.4			154078_at|Cyp4e2	5.66667			144081_at|CG13369	5.1			151110_at|Spase12	5.5			148662_at|CG10638	4.7
	143118_at|Dab	6.4			143844_at|Rab-RP3	5.66667			152288_at|Syx16	5.1			142685_at|mRpL36	5.5			146165_at|CG6113	4.7
	152217_at|CG2183	6.4			144635_at|CG14430	5.66667			142516_at|CG10077	5.1			154760_at|CG4618	5.5			149079_at|Grasp65	4.7
	152223_at|CG13604	6.4			151896_at|CG15012	5.66667			143444_at|T48	5.1			154305_at|MAN1	5.5			149869_at|CG9922	4.7
	141237_at|CG9705	6.4			152487_at|E2f2	5.66667			154872_at|CG9723	5.1			144713_at|CG2004	5.5			154228_at|sop	4.7
	141625_at|Syb	6.3			154083_at|Smg5	5.66667			154366_at|e(y)1	5.1			152428_at|Phm	5.5			143453_at|Klp64D	4.7
	152416_at|Ent2	6.3			144150_at|tafazzin	5.66667			142430_at|gkt	5.1			152371_at|Irk2	5.5			144613_at|CG3168	4.7
	152368_at|Irc	6.3			153239_at|CG8058	5.66667			141391_at|CG5846	5.1			152758_at|CG8199	5.5			150369_at|CG18594	4.7
	153220_at|Fpps	6.3			153412_at|CG31284	5.66667			149898_at|mRpL11	5.1			154049_at|ome	5.5			148713_at|CG14109	4.7
	141251_at|CG9796	6.3			141539_at|Trx-2	5.66667			150928_at|CG31006	5.1			153544_at|mRpL24	5.5			142587_at|CG33099	4.7
	154572_at|AP-47	6.3			144143_at|Idgf4	5.66667			153245_at|CG4065	5.1			153363_at|CG7048	5.5			152567_at|CG18585	4.7
	144140_at|Mpcp	6.3			153561_at|CG14647	5.66667			143038_at|Mes2	5.1			153220_at|Fpps	5.5			146225_at|Ast-C	4.7
	143139_at|eas	6.3			144179_at|Tim8	5.66667			141474_at|park	5.1			149063_at|CG9372	5.5			142934_at|CG4646	4.7
	148273_at|CG13298	6.3			152074_at|emp	5.66667			142174_at|CG32573	5.1			151960_at|Myo61F	5.5			147636_at|CG13492	4.7
	153733_at|Plc21C	6.3			154266_at|Ada2b	5.66667			154344_at|PSR	5.1			143143_at|Ef2b	5.5			152654_at|CG15279	4.7
	141605_at|Pax	6.3			152866_at|Cyp28d1	5.66667			149827_at|Ravus	5.1			153684_at|cact	5.5			144653_at|Rab39	4.7
	150222_at|CG4686	6.3			151950_at|Sptr	5.66667			152449_at|CG4389	5			143387_at|tsl	5.5			149052_at|CG9449	4.7
	151740_at|CG7033	6.3			152995_at|CG18316	5.66667			145327_s_at|CG6891	5			152332_at|CG2145	5.5			152410_at|alpha-Est5	4.7
	146663_at|PNGase	6.3			154979_at|CG3571	5.66667			154572_at|AP-47	5			155037_at|Pka-R1	5.5			146282_at|CG6579	4.7
	154547_at|CG7536	6.3			141758_at|Sc2	5.66667			149674_at|Tctp	5			141349_at|CG6981	5.5			148980_at|CG5506	4.7
	142357_at|CG14812	6.3			149195_at|ORMDL	5.66667			146882_at|ced-6	5			143875_at|Ipp	5.5			142202_at|CG4377	4.7
	147810_at|CG5554	6.3			152383_at|Argk	5.66667			153997_at|Vha100-1	5			143299_at|Pepck	5.5			142987_at|msta	4.7
	153924_at|14-3-3zeta	6.3			152591_at|CG11395	5.66667			154644_at|ProsMA5	5			153943_at|Ent1	5.5			146098_at|hoip	4.7
	141401_at|CG31033	6.3			153200_at|---	5.66667			142776_at|CG17680	5			143786_at|HLH106	5.4375			143898_at|RpL14	4.7
	154114_at|CG2818	6.3			153270_at|CG31063	5.66667			154024_at|Nap1	5			154977_at|Spase25	5.4375			152263_at|CG9312	4.7
	141475_at|CG11771	6.3			141550_at|CG2970	5.66667			142532_at|CG10627	5			152875_at|CG7277	5.4375			146491_at|CG16771	4.7
	152142_at|CG9175	6.3			151797_at|fbp	5.66667			151797_at|fbp	5			152518_at|l(1)G0022	5.4375			145998_at|CG7231	4.7
	141709_i_at|alphaTub84D	6.3			146732_at|CG1707	5.66667			152545_at|ERp60	5			146824_at|Vps25	5.4375			149234_at|CG11425	4.7
	154202_at|CG7946	6.3			152613_at|CG11255	5.66667			153279_at|Tapdelta	5			143742_at|Rab5	5.4375			154731_at|aralar1	4.7
	152311_at|siz	6.3			152781_at|Pgd	5.66667			153260_at|Mipp1	5			142653_at|CG8315	5.4375			152756_at|Arr1	4.7
	154794_at|CG6144	6.3			152501_at|Thiolase	5.66667			146029_at|CG13393	5			142734_at|CG7049	5.4375			153665_at|---	4.7
	142162_at|alpha-Man-II	6.3			153102_at|CG31224	5.58333			152785_at|CG11200	5			150602_at|CG4743	5.4375			149757_at|GstD3	4.7
	142385_at|Dcr-2	6.3			151645_at|lola	5.58333			151495_at|CG2930	5			143746_at|RpL7A	5.4375			144231_at|CG7968	4.7
	142860_at|CG31108	6.3			152398_at|CG10631	5.58333			149421_at|CG1939	5			142520_at|Atpalpha	5.4375			143127_at|Cyp6a2	4.7
	151529_at|Dhc64C	6.3			154787_at|Abi	5.58333			143658_at|mtacp1	5			142262_at|CG1623	5.4375			149699_at|CG6830	4.7
	154094_at|gp210	6.3			153791_at|l(2)NC136	5.58333			149188_at|CG7181	5			141475_at|CG11771	5.4375			150573_at|---	4.7
	141503_at|lva	6.3			141802_at|vimar	5.58333			152448_at|CG11236	5			152292_at|CG12736	5.4375			143025_at|CG32708	4.7
	154948_at|eIF2B-epsilon	6.3			141326_at|Akap200	5.58333			151799_at|msk	5			152570_at|CG3499	5.4375			150887_at|CG15533	4.7
	154252_at|LanA	6.3			153421_at|fdl	5.58333			144584_at|Lag1	5			146767_at|CG12825	5.4375			148171_at|CG33514	4.7
	153779_at|crb	6.3			153920_at|Btk29A	5.58333			146472_at|l(2)37Bb	5			154990_at|CG8121	5.4375			149701_at|CG6908	4.7
	142999_at|Taf4	6.3			153750_at|CG7289	5.58333			154512_at|PP2A-B	5			141717_at|Syx5	5.4375			151210_at|CG16836	4.7
